## Coexistence of amyloid- $\beta$ and Tau hyperphosphorylation rescues cognitive and electrophysiological deficiencies in a mouse model of Alzheimer's disease

Eva Dávila-Bouziguet<sup>1,2</sup>, Arnau Casòliba-Melich<sup>1,2</sup>, Georgina Targa-Fabra<sup>1,2</sup>, Lorena Galera-López<sup>3</sup>, Andrés Ozaita<sup>3</sup>, Rafael Maldonado<sup>3</sup>, José M. Delgado-García<sup>4</sup>, Agnès Gruart<sup>4</sup>, Jesús Ávila<sup>2,5</sup>, Eduardo Soriano<sup>1,2</sup>, Marta Pascual<sup>1,2</sup>

<sup>1</sup>Department of Cell Biology, Physiology and Immunology, Institut de Neurociències, Universitat de Barcelona, Barcelona, Spain.

<sup>2</sup>Centro de Investigación Biomédica en Red sobre Enfermedades Neurodegenerativas (CIBERNED, ISCIII), Spain.

<sup>3</sup>Laboratory of Neuropharmacology-NeuroPhar, Department of Experimental and Health Sciences, Pompeu Fabra University, Barcelona, Spain.

<sup>4</sup>Division of Neurosciences, Pablo de Olavide University, Seville, Spain.

<sup>5</sup>Centro de Biología Molecular Severo Ochoa (CSIC-UAM), Neurobiology Laboratory, Madrid, Spain.

**Corresponding author:** Marta Pascual, [marpascual@ub.edu](mailto:marpascual@ub.edu)

### Abstract

Alzheimer's disease hallmarks include amyloid- $\beta$  peptide (A $\beta$ ) and hyperphosphorylated Tau (P-Tau), abnormalities in hippocampal oscillatory rhythms, imbalance of neuronal activity, and cognitive deficits. J20 and VLW mice, accumulating A $\beta$  and P-Tau, respectively, show imbalanced neuronal activity and cognitive impairments. Here we analyzed mice simultaneously accumulating A $\beta$  and P-Tau (J20/VLW). No changes in A $\beta$  load or in P-Tau in pyramidal cells were observed in J20/VLW animals compared to respective single transgenic models. Conversely, the density of hippocampal interneurons accumulating pThr205 and pSer262 Tau was higher in J20/VLW than in VLW mice. The GABAergic septohippocampal (SH) connection specifically innervates hippocampal interneurons, modulating hippocampal electrophysiology. Contrarily to previous results showing an important reduction of GABAergic SH innervation in J20 and VLW mice, here we demonstrate that the GABAergic SH connection is preserved in J20/VLW animals. Furthermore, our findings indicate that hippocampal theta rhythms, markedly diminished in J20 and VLW mice, are partially rescued in J20/VLW animals. Moreover, the simultaneous presence of A $\beta$  and P-Tau rescues A $\beta$ -associated recognition memory deficits in J20/VLW mice. Altogether, these data suggest that a differential Tau phosphorylation pattern in hippocampal interneurons protects against loss of GABAergic SH innervation, preventing alterations in local field potentials and avoiding cognitive deficits.

### Keywords

Alzheimer's disease; J20 mice; VLW mice; GABAergic neurons; Tau phosphorylation; hippocampus; septohippocampal pathway

## INTRODUCTION

The histopathological hallmarks of Alzheimer's disease (AD) include neurodegeneration, extracellular deposits of amyloid- $\beta$  peptide (A $\beta$ ; i.e. senile plaques) and intracellular neurofibrillary tangles of hyperphosphorylated Tau protein (P-Tau) (Ballatore et al., 2007; Haass and Selkoe, 2007; Selkoe and Hardy, 2016).

The hippocampus, a region of the brain critical for learning and memory, is one of the earliest targets of AD. Altered neural activity, such as synaptically driven hyperactivity, has been observed in several mouse models of AD (Busche et al., 2012; Palop et al., 2007). Functional MRI studies have also revealed hippocampal hyperactivity in asymptomatic individuals at genetic risk of AD (Bookheimer et al., 2000; Quiroz et al., 2010; Reiman et al., 2012). Moreover, epileptiform activity is more common in individuals with AD than in controls (Horváth et al., 2016). Theta and gamma oscillations of local field potentials (LFP) are reduced in AD patients and animal models, thereby further indicating an imbalance between excitatory and inhibitory circuits, (Mably and Colgin, 2018; Palop and Mucke, 2016; Rubio et al., 2012; Verret et al., 2012; Villette and Dutar, 2016). Theta and gamma oscillations are regulated by fast-spiking, Parvalbumin (PV)-positive hippocampal interneurons (Buzsáki, 2005; Sohal et al., 2009). At the circuit level, hippocampal PV-positive cells provide perisomatic inhibition onto glutamatergic pyramidal and granular neurons and regulate spike timing (Amilhon et al., 2015; Pouille and Scanziani, 2001). Consistent with reduced PV output in AD, pyramidal neurons show reduced spontaneous GABAergic currents, and optogenetic stimulation of PV-positive cells can improve gamma oscillations and reduce A $\beta$  load and P-Tau levels in AD mouse models (Etter et al., 2019; Iaccarino et al., 2016). Additional work suggests that loss of GABAergic tone partly underlies network dysfunction in AD and tauopathies (Busche et al., 2015; Shimojo et al., 2020).

The basal forebrain, comprising the medial septum and diagonal band of Broca (MSDB) complex and the nucleus basalis of Meynert, innervates the cerebral cortex and the hippocampus. Its cholinergic component has long been known to degenerate in AD, as well as in normal aging (Whitehouse et al., 1982; Ypsilanti et al., 2008). Along with cholinergic fibers, the septohippocampal (SH) pathway consists of another key element, namely the GABAergic SH pathway. This component involves inhibitory long-range projection neurons that terminate specifically on GABAergic hippocampal interneurons (Freund and Antal, 1988; Gulyás et al., 1990), which in turn govern the activity of pyramidal neurons. The activation of GABAergic SH neurons is believed to result in the selective inhibition of inhibitory interneurons, hence enabling the synchronous activation of a large number of pyramidal neurons (Freund and Gulyás, 1997; Tóth et al., 1997). Therefore, the GABAergic SH pathway could be responsible for producing the correct levels of excitation, as well as regulating synchronous neuronal activities, including theta and gamma oscillations, which are crucial for memory and cognition (Buzsáki, 2005; Colgin and Moser, 2010; Garner et al., 2005; Hangya et al., 2009; Sotty et al., 2003; Varga et al., 2008; Vertes, 2005).

Several studies have reported alterations in the GABAergic SH pathway associated with AD. For instance, J20 mice expressing human amyloid precursor protein (hAPP) with familial AD Swedish and Indiana mutations (Mucke et al., 2000) present a marked deterioration, displayed as a reduced number and complexity of GABAergic SH axon terminals; this decline also correlates with electrophysiological changes within the hippocampal network (Rubio et al., 2012; Vega-Flores et al., 2014). Similarly, VLW mice expressing human Tau (hTau) with three mutations associated with frontotemporal dementia and Parkinsonism linked to chromosome 17 (FTDP-17) (Lim et al., 2001) show a decrease in GABAergic SH innervation (Soler et al., 2017). Moreover, VLW mice present epilepsy and GABA<sub>A</sub> receptor-mediated hyperexcitability (García-Cabrero et al., 2013).

Growing evidence indicates that Tau and A $\beta$  have opposing effects on neuronal excitability and circuit activity (Angulo et al., 2017; Busche et al., 2019). However, coexistence of Tau- and amyloid-related pathologies has been proposed to act synergistically to impair the function of neural circuits, and recent studies suggest that Tau has a dominating effect over A $\beta$  (Angulo et al., 2017; Busche et al., 2019), which contrasts with previous findings (DeVos et al., 2013; Ittner et al., 2010; Roberson et al., 2007). In fact, it has been proved that Tau blocks A $\beta$ -dependent hyperactivity when both Tau and A $\beta$  are simultaneously present in the cortex, resulting in extensive silencing of circuits *in vivo* (Busche et al., 2019). In support of this finding, coexpression of hAPP and hTau significantly decreases the hyperexcitability elicited by A $\beta$  alone *in vitro*, as demonstrated by extracellular field recordings of entorhinal cortex slices (Angulo et al., 2017).

To assess the synergic or opposing effects of A $\beta$  and P-Tau on hippocampal neuron physiology, hippocampal activity rhythms, and cognition, we crossed J20 and VLW mice to generate a double transgenic mouse model with both A $\beta$  and Tau pathologies, which are characteristic of AD. To the best of our knowledge, these well-established mouse lines have not been crossed to date. The A $\beta$  plaque load in the resulting J20/VLW mice did not differ from that present in single transgenic J20 animals. The analysis of Tau phosphoepitopes revealed high levels of Tau phosphorylated at residues Thr231 (pThr231) and pThr205 in CA1 pyramidal cells in J20/VLW mice, similar to VLW animals. In contrast, J20/VLW mice presented higher densities of hippocampal interneurons accumulating pThr205 and pSer262 than single transgenic VLW animals, thereby indicating an interneuron-specific modulation of Tau phosphorylation by A $\beta$ . Surprisingly, GABAergic SH innervation on hippocampal interneurons in J20/VLW mice did not differ from that in control animals. Examination of hippocampal electrophysiology revealed partial recovery of hippocampal theta oscillations in J20/VLW animals, such oscillations being greatly affected in J20 and VLW mice. Furthermore, recognition memory deficits associated with A $\beta$  accumulation were rescued in the double transgenic model.

## MATERIALS AND METHODS

### Animals

For the histological procedures, we used WT adult male mice (C57BL/6J strain; 8-month-old (mo) and 12 mo;  $n = 4-5$  per group) and transgenic adult male mice from three different lines with the same genetic background. We generated a double transgenic mouse line by crossbreeding J20 and VLW mice and used the resulting double mutant J20/VLW animals (8 mo and 12 mo;  $n = 4-5$  per group), as well as the single mutants J20 (8 mo and 12 mo;  $n = 4$  per group) and VLW mice (8 mo;  $n = 3-4$  per group). J20 animals overexpress hAPP carrying two familial AD mutations, namely Swedish (K670N/M671L) and Indiana (V717F), under the control of the PDGF $\beta$  promoter. VLW mice overexpress hTau with 4 tubulin-binding repeats and 3 mutations related to FTDP-17 (G272V, P301L, and R406W) under the control of the Thy-1 promoter. For the electrophysiological study, 8 mo WT, VLW, and J20/VLW mice were used ( $n = 4$  per group). For the behavioral studies, 8 mo WT ( $n = 9$ ), J20 ( $n = 6$ ), VLW ( $n = 7$ ), and J20/VLW ( $n = 5$ ) mice were used.

All animals were kept on a 12 h light/dark schedule with access to food and water *ad libitum*. All experiments were performed in accordance with the European Community Council Directive and the National Institute of Health guidelines for the care and use of laboratory animals. Experiments were also approved by the local ethical committees.

### Detection of septohippocampal fibers

Animals were deeply anesthetized with a 10/1 mixture of Ketolar<sup>®</sup> (50 mg/mL ketamine chlorhydrate, Parke-Davis)/Rompun<sup>®</sup> (2 % xylidine-thiazine chlorhydrate, Bayer) and stereotaxically injected with an anterograde tracer, 10 % biotinylated dextran-amine (BDA; 10,000 MW, Molecular Probes), in the MSDB complex. Each animal received midline injections of the tracer into the MSDB complex at one anteroposterior (AP) level, and at two dorsoventral (DV) injection sites by iontophoresis (7  $\mu$ A positive direct current, 7 s on/off cycle). Stereotaxic coordinates in millimeters were (from Bregma): AP +0.7 and DV -3.0 and -3.7 (Paxinos and Franklin, 2001). This protocol results in intense BDA labeling in the MSDB complex, which contains the highest proportion of GABAergic SH neurons (Pascual et al., 2004). After 5 or 6 days, the animals were deeply anesthetized and perfused with 4 % paraformaldehyde (PFA) in 0.1 M phosphate buffer (PB). The brains were post-fixed for 48 h in 4% PFA and cryoprotected with phosphate-buffered saline with 30 % sucrose at 4 °C. They were then frozen by quick immersion in 2-methylbutane at -50 °C, and 30- $\mu$ m coronal sections were cut. These were stored in a cryoprotectant solution (30 % glycerol, 30 % ethylene glycol, 40 % 0.1 M PB) at -20 °C until use. To visualize BDA, after blocking for 2 h, the sections were incubated overnight at 4 °C with the ABC complex (Vector Laboratories; 1/100). Peroxidase activity was developed with diaminobenzidine (DAB), intensified with nickel ammonium sulfate (Ni) and cobalt chloride (Co), and H<sub>2</sub>O<sub>2</sub>. Thereafter, sections were mounted onto gelatinized slides, Nissl-stained, and coverslipped with Eukitt<sup>®</sup> (O. Kindler).

## Immunodetection

Some hippocampal sections from iontophoretically injected WT and J20/VLW animals were processed for the double immunodetection of BDA and interneuron markers (Mátyás et al., 2004; Pascual et al., 2004; Rocamora et al., 1996). After blocking for 2 h, free-floating sections were incubated overnight at 4 °C simultaneously with the ABC complex (Vector Laboratories; 1/100) and rabbit polyclonal antibodies against PV (Swant®; 1/3000) or glutamic acid decarboxylase isoforms 65 and 67 (GAD, Chemicon International; 1/2000). BDA was revealed using DAB with Ni and Co, yielding a black end product in SH fibers. Primary antibodies were then visualized by sequential incubation with biotinylated secondary antibodies and the ABC complex (2 h each; Vector Laboratories). The peroxidase reaction was developed with DAB to produce a brown end product. The sections were mounted onto gelatinized slides, dehydrated, and coverslipped with Eukitt® (O. Kindler).

To detect the accumulation of pThr231, pThr205, or pSer262 Tau, tissue sections were blocked for 2 h and incubated overnight with AT-180 mouse anti-phosphothreonine 231 (Innogenetics; 1/300), T205 rabbit anti-phosphothreonine 205 (Invitrogen™; 1/1000), or S262 rabbit anti-phosphoserine 262 (Invitrogen™; 1/100) antibodies at 4 °C. Primary antibody visualization was performed as described, except that the peroxidase reaction was developed using DAB with Ni and Co, and H<sub>2</sub>O<sub>2</sub>, to intensify the final signal.

To determine whether hippocampal interneurons accumulated P-Tau, several double fluorescent immunostainings were conducted using AT-180, T205, or S262 and PV, Calretinin (CR), or Calbindin (CB) primary antibodies. First, sections from J20/VLW mice were blocked for 2 h and incubated overnight simultaneously with goat anti-PV (Swant®; 1/3000), goat anti-CR (Swant®; 1/3000), or mouse anti-CB (Swant®; 1/3000) antibodies and AT-180, T205, or S262. They were then incubated with Alexa Fluor 568 donkey anti-goat or anti-mouse IgG against interneuron primary antibodies, whereas P-Tau primary antibodies were targeted with Alexa Fluor 488 donkey anti-rabbit IgG or anti-mouse IgG (Invitrogen™; 1/1000), for 2 h. Sections were then mounted onto slides and coverslipped with Mowiol® (Merck).

Some hippocampal sections were stained with 3D6 mouse anti-A $\beta$  (amino acids 1–5) antibody (obtained from the supernatant of cultured Murine Hybridoma Cell Line, RB96 3D6.32.2.4 (PTA-5130), American Type Culture Collection; 1/200) to detect the presence of A $\beta$  plaques in J20 and J20/VLW mice. Primary antibody visualization was performed as described.

Sections corresponding to the medial septum from WT and J20/VLW mice were incubated with rabbit anti-PV antibody for the detection of PV-immunopositive SH projection neurons. Primary antibody visualization was performed as described.

## Analysis of the histological sections

Microscopic observations were focused on sections corresponding to the medial septum and to dorsal (sections between AP –1.6 and –2.3 mm from Bregma) and ventral (sections

between AP  $-2.9$  and  $-3.4$  mm from Bregma) hippocampal levels, following the atlas reported by Paxinos and Franklin (Paxinos and Franklin, 2001).

To estimate the density of GABAergic SH neurons, the samples stained with PV were scanned with a NanoZoomer 2.0HT whole slide imager (Hamamatsu Photonics) at 20x. The density of PV-immunopositive interneurons in the MSDB complex was quantified in serial sections (8 mo WT and J20/VLW mice;  $n = 4$  animals per group, 4 sections per animal). The cells and the area comprising the MSDB complex were quantified using Fiji software. The density of GABAergic SH neurons was defined as the density of PV-immunopositive cells per square millimeter.

To estimate the density of hippocampal interneurons and the percentage of these cells contacted by GABAergic SH fibers, the density of interneurons containing PV, as well as the percentage of these receiving BDA-positive pericellular baskets, was calculated in distinct regions of the hippocampal area (DG, CA3, and CA1) of each section (8 mo and 12 mo WT and J20/VLW mice;  $n = 4-5$  animals per group, 3 sections per animal). The area comprising the hippocampal regions of each section was quantified using Fiji software. A similar procedure was performed for GAD-immunopositive cells. However, due to the large number of GAD-immunopositive cells, we selected several sample areas for each section (8 mo and 12 mo WT and J20/VLW mice;  $n = 4$  animals per group, 3 sections per animal). The selected samples (125  $\mu\text{m}$ -wide stripes) contained all hippocampal layers (perpendicularly from the ventricle to the pial surface), and each section included 1 stripe in the DG, 2 in the CA3, and 3 in the CA1. For both interneuron populations, data were represented as the density of interneurons per square millimeter, and as the percentage of GAD- or PV-positive cells contacted by GABAergic SH fibers. To assess the complexity of the GABAergic SH contacts, synaptic boutons around the soma of hippocampal GAD- or PV-positive cells were counted in the same sample areas under an optical microscope (Nikon E600, Nikon Corporation); in this case, data were expressed as the number of boutons per single basket.

To estimate the density of interneurons accumulating pThr231, pThr205, or pSer262 Tau, and to compute the mean gray value of the pThr231 and pThr205 signals in pyramidal neurons, the samples stained with AT-180, T205, or S262 antibodies were scanned with a NanoZoomer 2.0HT whole slide imager at 20x. The density of pThr231, pThr205, and pSer262 Tau-immunopositive interneurons was quantified in various regions and layers of the hippocampal area (CA1, *stratum oriens* (so), *stratum radiatum* (sr), *stratum lacunosum moleculare* (slm); CA3, so, sr; and DG, *stratum moleculare* (sm), *stratum granulare* (sg), hilus) of each section (8 mo WT, J20, VLW, and J20/VLW mice;  $n = 4$  animals per group, 3 sections per animal). The cells and area comprising each hippocampal region were quantified using Fiji software. The density of immunopositive hippocampal cells was defined as the density of cells per square millimeter. The mean gray value of the pThr231 and pThr205 Tau signals was calculated in 10 square millimeter stripes in matching regions of the pyramidal layer of the CA1 after thresholding the images to exclude background signal (8 mo VLW and J20/VLW mice;  $n = 3-4$  animals per group, 3 sections per animal).

To assess the percentage of A $\beta$  plaque load in each hippocampal region, the samples stained with 3D6 antibody were scanned with a NanoZoomer 2.0HT whole slide imager at 20x. Later, the Trainable Weka Segmentation plugin (Arganda-Carreras et al., 2017) from Fiji software was applied to the images by using a set of machine-learning algorithms with a collection of image features selected by the user to produce pixel-based segmentations. All images were processed using a macro provided by Sebastián Tosi (Institute for Research in Biomedicine, Barcelona) to identify and quantify the A $\beta$  plaques present in a given hippocampal section (8 mo and 12 mo J20 and J20/VLW mice;  $n = 4$  animals per group, 3 sections per animal).

### **Statistical analysis of histological data**

Histological data were processed for statistical analysis with GraphPad Prism 8 (GraphPad Software Incorporated). All data were tested for normal distribution. To examine differences between two experimental groups, unpaired two-tailed Student's  $t$ -test or Welch's  $t$ -test were used, when the samples had equal variances or not, respectively. To assess differences between more than two experimental groups, one-way ANOVA was used. Post hoc comparisons were performed by Tukey's test only when a significant main effect of one-way ANOVA was revealed. The significance level was set at  $p < .05$ : \* $p < .05$ , \*\* $p < .01$ . Statistical values are presented as mean  $\pm$  standard error of the mean (SEM).

### **Image acquisition**

Optical microscopy (Nikon E600, Nikon Corporation) observations were focused on the immunohistochemically stained brain sections. Images were acquired through a digital camera (Olympus DP72, Olympus Corporation) coupled to the microscope and were processed by Cell F<sup>^</sup> software (Olympus Corporation).

Confocal microscopy (Leica TCS SP5, Leica Microsystems) observations were performed to acquire images from the immunofluorescence-stained samples, using LAS AF software (Leica Microsystems). The images were then processed by Fiji software (Schindelin et al., 2012) to observe possible colocalization between the interneuron and P-Tau markers.

### **Surgery for the chronic recording of hippocampal local field potentials**

Eight mo WT, VLW, and J20/VLW mice were anesthetized with 0.8–3 % halothane delivered from a calibrated Fluotec 5 vaporizer (Datex-Ohmeda) at a flow rate of 1–2 L/min oxygen. Animals were implanted with a recording electrode aimed to the ipsilateral *stratum radiatum* underneath the hippocampal CA1 area. Stereotaxic coordinates in millimeters were (from Bregma): AP  $-2.2$ , lateromedial (LM)  $1.2$ , and DV  $-1.0$  to  $-1.5$  (Paxinos and Franklin, 2001). These electrodes were made of 50- $\mu$ m Teflon-coated tungsten wire (Advent Research Materials Ltd). A bare silver wire (0.1 mm) was affixed to the skull as a ground. All wires were soldered to a 6-pin socket, and the socket was fixed to the skull with the help of two small screws and dental cement (see (Gruart et al., 2006) for details).

## Recording procedures

The electroencephalographic field activity of the CA1 area was recorded with the help of Grass P511 differential amplifiers. LFP recordings were carried out with the awake animal placed in either a small box (5 x 5 x 5 cm) to prevent walking movements or a large box (20 x 15 x 15 cm) in which the animal could move freely. Recordings were carried out for 20 min, of which up to 5 min of recording free of unwanted artifacts were selected for spectral analysis.

## Data analysis of electrophysiological studies

Hippocampal activity was stored digitally on a computer through an analog/digital converter (CED 1401 Plus, CED), at a sampling frequency of 11–22 kHz and an amplitude resolution of 12 bits. Commercial computer programs (Spike 2 and SIGAVG, CED) were modified to represent recorded LFPs.

The power spectrum of hippocampal LFPs collected during recording sessions was computed with the help of the Mat Lab 7.4.0 software (MathWorks), using the fast Fourier transform with a Hanning window, expressed as relative power and averaged across each session. This average was analyzed and compared using the wide-band model, considering the following bands: delta (< 4 Hz), theta (4.1–8 Hz), alpha (8.1–12 Hz), beta (12.1–26 Hz), and gamma (26.1–100 Hz) (Fernández-Lamo et al., 2016; Múnera et al., 2000).

## Behavioral tests

### *Novel object-recognition test (NORT)*

Object-recognition memory was assessed following a protocol previously described (Puighermanal et al., 2009). Briefly, on day 1, mice were habituated to a V-shaped maze (each corridor measuring 30 cm long x 4.5 cm wide x 15 cm high) for 9 min. On day 2, two identical objects (familiar objects) were located at the end of each corridor for 9 min and the time that the mice spent exploring each object was measured. Twenty-four hours later, one of the familiar objects was replaced by a new object (novel object) (see Fig. 1A). The time spent exploring each of the objects was computed to calculate a discrimination index (DI). The DI was calculated as the difference between the time spent exploring the novel object ( $T_n$ ) minus the time exploring the familiar object ( $T_f$ ) divided by the total exploration time (addition of the time exploring both objects), ( $DI = (T_n - T_f) / (T_n + T_f)$ ). Object exploration was defined as the orientation of the nose towards the object at a distance of < 2 cm. Mice that explored both objects for < 10 s or one object for < 3 s were excluded from the analysis. A higher DI is considered to reflect greater memory retention for the familiar object. Total exploration time was considered a measure of general activity during the test.

### *Elevated plus-maze*

Anxiety-like behavior was evaluated using the elevated plus-maze test. The setup consists of a black Plexiglas apparatus with 4 arms (29 cm long x 5 cm wide)—2 open and 2 closed—set in a cross from a neutral central square (5 x 5 cm) elevated 40 cm above the



floor. Light intensity in the open and closed arms was 45 and 5 luxes, respectively. Mice were placed in the central square facing one of the open arms and tested for 5 min. The percentage of entries into the open arms was determined as  $100 \times (\text{entries into open arms}) / (\text{entries into open arms} + \text{entries into closed arms})$ . Animals that exited the maze during exploration were excluded from the analysis. The total entries into each arm were calculated as a control of exploratory behavior.

#### *Rotarod*

Motor coordination was assessed using the accelerating rotarod (5-lane accelerating rotarod; LE 8200, Panlab). On day 1, mice were trained to hold onto the rod at a constant speed (4 rpm) for at least 120 s. On day 2, mice were trained to hold onto the rod at a constant speed higher than the previous day (6 rpm) for at least 120 s. On day 3, the test was performed. During the test, the rod accelerated from 4 to 40 rpm within 1 min, and latency to fall and maximum speed were measured in 5 consecutive trials. Data are expressed as the mean of the 5 trials.

#### **Statistical analysis of behavioral tests**

Behavioral data were processed for statistical analysis with GraphPad Prism 8 (GraphPad Software Incorporated). Comparisons between experimental groups were performed by one-way ANOVA. Post hoc comparisons were performed by Fisher's LSD test only when a significant main effect of one-way ANOVA was revealed. The significance level was set at  $p < .05$ . Statistical values are presented as mean  $\pm$  SEM.

## RESULTS

### Cognitive recovery of J20/VLW double transgenic mice in contrast to J20 animals

J20 and VLW mice show important cognitive deficits, mainly in spatial memory (Navarro et al., 2008; Rodríguez-Navarro et al., 2008; Webster et al., 2014). To characterize double transgenic J20/VLW mice, which accumulate both A $\beta$  and P-Tau, we performed various tests to analyze long-term memory, comparing 8 mo WT, J20, VLW, and J20/VLW animals. First, we determined that there were no major differences in either locomotion or anxiety between the four experimental groups (Suppl. Fig. 1). Surprisingly, alterations in NORT performance of J20 animals, which have been previously described (Cissé et al., 2011; Escribano et al., 2009; Harris et al., 2010), were not present in J20/VLW mice, which showed a behavior equivalent to that of WT mice (Fig. 1B). These data suggest that the specific forms of P-Tau in VLW mice, in coexistence with A $\beta$  accumulation, protect against the recognition memory deficits associated with A $\beta$ . Such specific differences were not related to exploratory behavior or motility, since total exploration times in the NORT were similar in the four experimental groups (Fig. 1C).

### No changes in A $\beta$ accumulation in J20/VLW animals compared to J20 mice

To study whether the presence of P-Tau induces changes in A $\beta$  accumulation, we performed immunodetection with 3D6 antibody (which specifically detects amino acids 1–5 of A $\beta$ ) on J20/VLW and J20 hippocampal sections. Quantification of the percentage of A $\beta$  plaques confirmed no changes in the accumulation of A $\beta$  plaques in the hippocampus of J20/VLW mice compared to J20 animals at 8 mo (Fig. 2A-C). Given that the amount of plaques is minor at this maturation stage, we then analyzed 12 mo animals. The percentage of A $\beta$  plaques in the hippocampus of 12 mo J20/VLW and J20 littermates was similar (Fig. 2D-F), suggesting that the cognitive improvement observed in J20/VLW animals is not a consequence of a reduction in A $\beta$  plaque load in double transgenic mice.

### Characterization of Tau phosphorylation in the hippocampus of J20/VLW mice

A $\beta$  has been described to induce Tau phosphorylation both *in vivo* and *in vitro* (Jin et al., 2011; Zempel et al., 2010). Thus, we examined Tau phosphorylation in this new double transgenic mouse model. By immunodetection, we demonstrate that there are no changes in the accumulation of Tau phosphorylated at residues Thr231 or Thr205 in the somatodendritic compartment of pyramidal neurons when comparing VLW and J20/VLW mice (Fig. 3A-D). No differences in the pThr231 and pThr205 Tau signals in the CA1 pyramidal layer were detected between 8 mo VLW and J20/VLW animals (Fig. 3C, D). No pSer262 Tau was present in the pyramidal layer of either VLW or J20/VLW mice.

Considering our recent data describing the presence of pThr231, pThr205, and pSer262 Tau in the soma of hippocampal interneurons in VLW mice (Dávila-Bouziguet et al., 2019), we next compared the distribution and density of interneurons accumulating P-Tau in VLW and J20/VLW mice. Our data indicate that, in addition to pyramidal cells, some hippocampal interneurons located mainly in the *stratum oriens* of the CA1 accumulate pThr231 Tau both in VLW and J20/VLW mice (Fig. 4A, D). Although no statistical differences in the density of pThr231 Tau-positive interneurons were found between the

VLW and J20/VLW hippocampus, a clear upward trend was observed in double transgenic mice (Fig. 4G).

Subsequently, we examined the density and distribution of pThr205 Tau-positive. Our previous data demonstrated that some interneurons in the WT hippocampus accumulate pThr205 Tau. Moreover, our former data indicated that A $\beta$  presence in J20 mice induces an increase in the density of hippocampal interneurons accumulating pThr205 Tau, and that P-Tau accumulation in VLW mice induces a reduction in the pThr205 Tau-positive interneuron density (Fig. 4B, H) (Dávila-Bouziguet et al., 2019). In J20/VLW double transgenic mice, the density of pThr205 Tau-positive hippocampal interneurons was higher than in VLW animals and lower than in the J20 hippocampus, being similar to that of WT animals (Fig. 4E, H). Thus, our data indicate that the increase in Tau phosphorylation at residue Thr205 induced by A $\beta$  and the decrease observed in the VLW hippocampus are abolished by the simultaneous presence of A $\beta$  and P-Tau in J20/VLW animals (Fig. 4B, E, and H).

Additionally, our results show a considerable increase in the density of interneurons accumulating pSer262 Tau in J20/VLW mice compared with VLW animals (Fig. 4C, F and I). This observation suggests a synergic effect of P-Tau and A $\beta$  in the induction of Tau phosphorylation at residue Ser262 in hippocampal interneurons.

#### **Distinct types of hippocampal interneurons accumulate P-Tau in J20/VLW mice**

To characterize the interneuron subtypes accumulating P-Tau, double fluorescent immunodetection of pThr231, pThr205, and pSer262 Tau, combined with detection of the interneuron markers PV, CR, and CB, was performed on J20/VLW hippocampal slices. As described in VLW animals, pThr231 Tau accumulated specifically in some PV-positive interneurons throughout the hippocampus (Fig. 5A-C), while some PV-, CR-, and CB-positive interneurons scattered in different hippocampal layers and regions accumulated pThr205 and pSer262 Tau (Fig. 5D-L). In agreement with previous data in human AD (Blazquez-Llorca et al., 2010), only a few PV-positive cells with pThr205 Tau in their soma were present in the J20/VLW hippocampus.

#### **The GABAergic SH pathway is preserved in J20/VLW mice**

The GABAergic SH pathway and its specific targets, namely hippocampal interneurons, are crucial for the correct excitation/inhibition balance in the hippocampus (Buzsáki, 2002; Gangadharan et al., 2016; Hangya et al., 2009). Altered neural activity, particularly hyperactivity, has been described in J20 and VLW mice (García-Cabrero et al., 2013; Palop et al., 2007), indicating an imbalance between excitatory and inhibitory circuits (Ambrad Giovannetti and Fuhrmann, 2019; Palop and Mucke, 2016). Our previous data demonstrated a 40 % and a 36 % reduction in the percentage of GABAergic hippocampal interneurons (GAD-immunopositive) innervated by GABAergic SH fibers in J20 and VLW mice, respectively, compared with WT animals (Fig. 6G) (Rubio et al., 2012; Soler et al., 2017). In addition, J20 animals showed a 34 % decrease in the number of GABAergic SH boutons on GAD-positive hippocampal cells (Fig. 6H) (Rubio et al., 2012). Consequently, our previous results suggested that the impairment of GABAergic SH innervation, which

modulates hippocampal network activities, causes the cognitive deficits present in J20 and VLW mice (Rubio et al., 2012; Soler et al., 2017). To determine whether the recovery of cognitive function observed in J20/VLW mice correlated with a rescue of the GABAergic SH pathway, we injected an anterograde tracer in the MSDB complex. First, GABAergic SH innervation on GAD-positive interneurons was analyzed. Neither the distribution nor percentage of GAD-immunopositive neurons contacted by septal GABAergic fibers nor the complexity of the GABAergic SH synaptic contacts were altered in 8 mo J20/VLW mice compared to WT animals (Fig. 6).

We next studied GABAergic SH innervation on PV-positive hippocampal interneurons in J20/VLW animals. Our previous data showed that PV-positive cells were the hippocampal interneuron population most affected by the loss of GABAergic SH innervation, with J20 and VLW mice showing a 30 % and a 36 % reduction, respectively, in the percentage of PV-positive cells contacted by GABAergic SH fibers. Moreover, the complexity (number of boutons per cell) of the GABAergic SH contacts on PV-positive cells was reduced by 36 % and 34 % in J20 and VLW mice, respectively (Fig. 7G, H) (Rubio et al., 2012; Soler et al., 2017). Our present data indicate that the distribution and the percentage of PV-containing interneurons contacted by GABAergic SH fibers are spared in J20/VLW mice, and only a slight decrease in the complexity of the GABAergic SH contacts on PV-positive cells occurs in double transgenic mice (Fig. 7).

To determine whether the improvement in GABAergic SH innervation in J20/VLW animals is due to a permanent recovery or to a delay in the impairment of the GABAergic SH pathway, we analyzed 12 mo mice. Neither a reduction in the percentage of GAD- and PV-positive neurons contacted by GABAergic SH fibers nor in the number of synaptic boutons per GAD- and PV-positive cell was observed in 12 mo J20/VLW mice compared to age-matched WT animals (Fig. 8).

All these data suggest that presence of Tau with a specific phosphorylation pattern together with A $\beta$  accumulation in J20/VLW mice protects against the GABAergic SH denervation associated with A $\beta$  and P-Tau separately. These data suggest that the maintenance of correct GABAergic SH innervation in J20/VLW mice underlies the preservation of cognitive function in this double transgenic model.

### **No loss of hippocampal and septal GABAergic neurons in J20/VLW mice**

To assess the GABAergic cell population in J20/VLW animals, we next analyzed the density and distribution of hippocampal and septal GABAergic neurons in 8 mo mice by immunodetection. The distribution and density of hippocampal GABAergic neurons (GAD-positive cells) in J20/VLW mice were similar to those of WT mice. GAD-positive cells were located throughout distinct layers and areas in the hippocampus (Fig. 9A-C). We then studied the PV-positive subtype of interneurons. No alterations in either the distribution or density of PV-positive cells were detected in the J20/VLW hippocampus (Fig. 9E-G). Furthermore, to discard a delay in the degeneration of the hippocampal interneuron population, we examined 12 mo J20/VLW animals and compared them with age-matched WT mice. Neither alterations in the distribution nor in the density of

hippocampal interneurons immunoreactive to GAD or PV were observed in 12 mo J20/VLW mice (Fig. 9D, H).

Next, we analyzed the GABAergic SH neurons in the septal region by PV immunodetection. Our results indicated the preservation of both the distribution and density of PV-positive cells in the J20/VLW MSDB complex, compared with age-matched WT animals (Suppl. Fig. 2).

On the basis of all these data, we can conclude that J20/VLW mice do not show altered distribution or loss of septal and hippocampal GABAergic neurons.

### **Hippocampal electrophysiology, which is altered in J20 and VLW mice, is preserved in J20/VLW animals**

The GABAergic SH pathway is crucial for hippocampal electrophysiology and cognition (Etter et al., 2019; Hangya et al., 2009; Varga et al., 2009). Given that our data demonstrate the preservation of the GABAergic SH network when both A $\beta$  and P-Tau are present, we studied the oscillatory activities of hippocampal circuits in 8 mo behaving WT, J20, VLW, and J20/VLW mice. Chronically implanted electrodes recorded hippocampal field activity in animals placed in either small or large boxes, to determine the contribution of overt motor activities to the power spectra of the theta and gamma bands. As previously described (Rubio et al., 2012), the spectral analysis of LFP recordings showed a clear decrease in the spectral power of the theta band in J20 mice placed in small and large boxes (43 % and 38 %, respectively) compared with age-matched WT animals. In addition, a considerable reduction in theta spectral power was present in VLW animals placed in small and large boxes (33 % and 42 %, respectively). In contrast, J20/VLW mice showed only a slight decrease in theta spectral power when located in small and large boxes (8 % and 22 %, respectively). We also examined the spectral power of the gamma band. In a previous study (Rubio et al., 2012), we found a 50 % reduction in gamma spectral power in J20 animals placed in large and small boxes compared with WT mice. Our present results demonstrate that the gamma band in VLW animals was equivalent to that of WT mice and, interestingly, indicated a 33 % reduction in this band in J20/VLW mice compared with age-matched WT animals.

Taken together, these data indicate that the major alterations in theta and gamma rhythms observed in J20 and VLW animals are not evident in J20/VLW mice, thereby suggesting that the simultaneous presence of Tau phosphorylated at specific residues and A $\beta$  accumulation preserves hippocampal function in the double transgenic animals.

## Discussion

### **No changes in A $\beta$ plaque load or P-Tau in pyramidal cells are present in J20/VLW animals compared with J20 and VLW mice, respectively**

While A $\beta$  may cause Tau phosphorylation and Tau may increase A $\beta$  toxicity, there are conflicting lines of evidence as to whether Tau leads to an increase in amyloid deposition. Certain APP/Tau mice overexpressing hAPP<sup>SW</sup> together with hTau P301L (JNPL3/Tg2576 and APP23/B6P301L) show no differences in A $\beta$  plaque load compared with single hAPP<sup>SW</sup> transgenic mice (Bolmont et al., 2007; Lewis et al., 2001). However, 16 mo Tg2576/VLW mice displayed enhanced amyloid deposition (Ribé et al., 2005). Our data demonstrate that no changes in A $\beta$  deposition are present in J20/VLW mice compared with J20 animals at either 8 mo or 12 mo, although an increase in A $\beta$  deposition at later stages in double transgenic mice cannot be discarded.

Previous studies demonstrated that A $\beta$  increases Tau phosphorylation (Götz et al., 2001; Nisbet et al., 2015; Pérez et al., 2005). Thus, after the characterization of J20/VLW mice, we examined the pattern of P-Tau by immunohistochemistry to assess the modification of Tau phosphorylation in double transgenic mice. No changes in the levels of Tau phosphorylation at either Thr231 or Thr205 were observed in hippocampal pyramidal neurons when comparing VLW and J20/VLW mice, or at pSer262 Tau, which is absent in pyramidal neurons in both animal models. In addition, P-Tau mislocalization to the somatodendritic compartment of pyramidal cells described previously in VLW mice (Dávila-Bouziguet et al., 2019; Lim et al., 2001; Soler et al., 2017) also occurred in the J20/VLW hippocampus.

### **GABAergic SH innervation is preserved in J20/VLW mice**

We previously described that A $\beta$  accumulation in J20 mice and P-Tau presence in VLW animals induce abnormal GABAergic SH innervation in these two animal models (Rubio et al., 2011; Soler et al., 2017). In the present study, we sought to examine the GABAergic SH pathway in a double transgenic animal, J20/VLW, which accumulates both A $\beta$  and P-Tau. Our results show that J20/VLW mice present neither altered distribution nor loss of septal or hippocampal GABAergic neurons. Surprisingly, our data indicate that the presence of P-Tau together with A $\beta$  accumulation in J20/VLW mice protects against the GABAergic SH denervation associated with A $\beta$  and P-Tau separately. Our findings also confirm a permanent effect since no alterations were observed in either 8 mo or 12 mo J20/VLW animals. No changes in A $\beta$  plaque load or P-Tau accumulation and mislocalization in pyramidal neurons occurred in J20/VLW animals compared with J20 or VLW mice, respectively. Our data suggest that the maintenance of correct GABAergic SH innervation could be due to the specific pattern of Tau phosphorylation in hippocampal interneurons in J20/VLW mice.

### **Altered pattern of P-Tau in hippocampal interneurons in J20/VLW mice**

In addition to the presence of P-Tau in pyramidal neurons in the hippocampus of murine models of AD (Götz et al., 1995; Rossi et al., 2020), our recent work determined that hippocampal interneurons accumulate P-Tau in their soma in control and pathological

conditions (Dávila-Bouziguet et al., 2019). As previously described in hAPP<sup>SW</sup>-VLW mice (Pérez et al., 2005), our data indicate that A $\beta$  presence enhanced Tau microtubule-binding domain phosphorylation at non-proline directed phosphorylation (NPDP) sites such as Ser262 in J20/VLW interneurons in comparison to VLW mice. These findings reveal that A $\beta$  facilitates Tau phosphorylation at NPDP sites specifically in GABAergic neurons. It has been described that phosphorylation of Tau at Ser262 induces its detachment from microtubules (Ando et al., 2016). Our previous data pointed to a novel role of P-Tau in the somatic cytosol of hippocampal interneurons (Dávila-Bouziguet et al., 2019). Therefore, the localization of Tau mainly in the soma of GABAergic neurons may be caused by a lack of adhesion to axonal microtubules of pSer262 Tau. Moreover, it has been reported that A $\beta$  induction of pThr231 Tau is dependent on pSer262 (Ando et al., 2016). Thus, the clear upward trend in the density of pThr231 Tau-positive interneurons in J20/VLW mice may be a consequence of the increased number of hippocampal interneurons accumulating pSer262 Tau in these animals. Taken together, these data suggest that, in the J20/VLW hippocampus, the increase in Tau phosphorylated at both Ser262 and Thr231 in GABAergic neurons facilitates the somatic localization of Tau, thereby favoring a novel function of this protein in the soma of hippocampal interneurons in this mouse model.

As a microtubule-binding protein, Tau may participate in the dynamic regulation of GABA<sub>A</sub>R trafficking at inhibitory synapses through the scaffolding protein gephyrin, which is directly linked to the cytoskeleton (Essrich et al., 1998). By regulating GABA<sub>A</sub>R synaptic clustering, gephyrin controls GABAergic synaptic activity and, therefore, inhibitory transmission (Maric et al., 2017). In addition, it has been described that GSK3 $\beta$ , a major Tau kinase activated by A $\beta$ , regulates GABAergic synapse formation via the phosphorylation of gephyrin (Tyagarajan et al., 2011; Tyagarajan and Fritschy, 2014).

Further research is required to gain a full understanding of the molecular mechanisms by which a distinct pattern of Tau phosphorylation modulates the function of GABAergic neurons. However, one hypothesis is that GSK3 $\beta$  activation by A $\beta$  induces both an increase in P-Tau in the soma of GABAergic interneurons and the phosphorylation of gephyrin, thereby contributing to GABA receptor clustering, thus preserving the GABAergic SH synaptic contacts on hippocampal interneurons and, therefore, stabilizing inhibitory synaptic activity.

### **Preserved hippocampal rhythms in J20/VLW mice**

Our previous data indicated that impaired GABAergic SH innervation in J20 mice correlates with altered patterns of neuronal hippocampal activity and with internal processes related to operant rewards. Spectral analysis showed a clear decrease in the spectral power of theta and gamma bands in J20 mice (43–38 % and 50 % decrease, respectively) compared with age-matched WT animals (Rubio et al., 2012; Vega-Flores et al., 2014). Furthermore, VLW animals overexpressing mutant hTau display hyperexcitability in the absence of A $\beta$ , along with alterations in the GABAergic SH pathway (García-Cabrero et al., 2013; Soler et al., 2017). Here we demonstrate a considerable reduction in theta spectral power (33–42 %) in VLW animals. In contrast,

J20/VLW mice showed only a slight decrease in the spectral power of theta (8–22 %) and gamma (33 %) bands. A $\beta$  species cause synaptic loss and dysfunction in both glutamatergic and GABAergic synapses (Palop and Mucke, 2010; Rubio et al., 2012). It has been proposed that the GABAergic SH pathway regulates oscillatory activity, particularly through the recruitment of hippocampal interneurons. The main targets of the GABAergic SH fibers are the axo-axonic and basket PV-positive neurons, which control the firing of large numbers of pyramidal neurons, hence leading to the generation of oscillatory activities in the range of the theta and gamma frequencies. Here we describe only minor alterations in the spectral power of theta and gamma bands in 8 mo J20/VLW mice compared with J20 animals. Overall, our data indicate that the major alterations in theta and gamma rhythms observed in J20 and VLW animals are only minor in J20/VLW mice, and they point to a correlation between preserved GABAergic SH innervation and proper hippocampal rhythmic activity.

### **No cognitive deficits in J20/VLW mice**

Finally, the present study explores the relevance of correct GABAergic SH innervation and electrophysiological preservation for the cognitive state of J20/VLW animals. Our results indicate that the simultaneous presence of A $\beta$  and P-Tau reverses the cognitive impairments observed in J20 and VLW mice. As described in AD and some AD animal models (Ambrad Giovannetti and Fuhrmann, 2019; Cheng et al., 2007; Palop and Mucke, 2016; Verret et al., 2012), J20 and VLW animals display an imbalance between excitatory and inhibitory circuits associated with hyperexcitability and cognitive deficits. In contrast, double transgenic J20/VLW animals showed no major alterations in theta and gamma hippocampal rhythms, thereby suggesting a proper excitation/inhibition balance, probably modulated by GABAergic SH fibers, and, therefore, by correct hippocampal GABAergic function. Our results reveal no cognitive deficits in J20/VLW animals and point to a correlation between proper GABAergic synaptic function and cognition.

Taken together, our results suggest that the differential Tau phosphorylation pattern in the hippocampal interneurons of J20/VLW mice protects against the loss of GABAergic SH innervation, thereby preventing alterations in LFPs and, subsequently, hindering cognitive deficits. These data support a new role of P-Tau in the maintenance of the GABAergic SH network and hippocampal GABAergic activity and indicate the potential of P-Tau regulation in GABAergic neurons as a therapeutic target in AD.



### **Disclosure statement**

The authors have no actual or potential conflicts of interest to disclose.

### **Acknowledgements**

The authors thank the personnel of the Advanced Optical Microscopy Facility at the Scientific and Technological Centers of the University of Barcelona for support, Alba Vílchez-Acosta for technical help, and the personnel of the Histopathology Facility of the Institute for Research in Biomedicine for assistance.

This work was supported by funds from the Ministry of Economy, Industry and Competitiveness (SAF2016-76340-R and PID2019-106764RB-C21) to E.S., and (BFU2017-82375-R) to A.G. and J.M.D.-G; by the María de Maeztu Unit of Excellence awarded to the Institute of Neurosciences; and by a FPU grant from the Ministry of Education, Culture and Sport (FPU2016-07395) awarded to E.D.

## REFERENCES

- Ambrad Giovannetti, E., Fuhrmann, M., 2019. Unsupervised excitation: GABAergic dysfunctions in Alzheimer's disease. *Brain Res.* 1707, 216–226. doi:10.1016/j.brainres.2018.11.042
- Amilhon, B., Huh, C.Y.L., Manseau, F., Ducharme, G., Nichol, H., Adamantidis, A., Williams, S., 2015. Parvalbumin interneurons of hippocampus tune population activity at theta frequency. *Neuron* 86, 1277–1289. doi:10.1016/j.neuron.2015.05.027
- Ando, K., Maruko-Otake, A., Ohtake, Y., Hayashishita, M., Sekiya, M., Iijima, K.M., 2016. Stabilization of microtubule-unbound Tau via Tau phosphorylation at Ser262/356 by Par-1/MARK contributes to augmentation of AD-related phosphorylation and A $\beta$ 42-induced Tau toxicity. *PLoS Genet.* 12, e1005917. doi:10.1371/journal.pgen.1005917
- Angulo, S.L., Orman, R., Neymotin, S.A., Liu, L., Buitrago, L., Cepeda-Prado, E., Stefanov, D., Lytton, W.W., Stewart, M., Small, S.A., Duff, K.E., Moreno, H., 2017. Tau and amyloid-related pathologies in the entorhinal cortex have divergent effects in the hippocampal circuit. *Neurobiol. Dis.* 108, 261–276. doi:10.1016/j.nbd.2017.08.015
- Arganda-Carreras, I., Kaynig, V., Rueden, C., Eliceiri, K.W., Schindelin, J., Cardona, A., Seung, H.S., 2017. Trainable Weka Segmentation: A machine learning tool for microscopy pixel classification. *Bioinformatics* 33, 2424–2426. doi:10.1093/bioinformatics/btx180
- Ballatore, C., Lee, V.M.-Y.M.-Y., Trojanowski, J.Q., 2007. Tau-mediated neurodegeneration in Alzheimer's disease and related disorders. *Nat. Rev. Neurosci.* 8, 663–672. doi:10.1038/nrn2194
- Blazquez-Llorca, L., Garcia-Marin, V., DeFelipe, J., 2010. Pericellular innervation of neurons expressing abnormally hyperphosphorylated tau in the hippocampal formation of Alzheimer's disease patients. *Front. Neuroanat.* 4, 20. doi:10.3389/fnana.2010.00020
- Bolmont, T., Clavaguera, F., Meyer-Luehmann, M., Herzig, M.C., Radde, R., Staufenbiel, M., Lewis, J., Hutton, M., Tolnay, M., Jucker, M., 2007. Induction of Tau pathology by intracerebral infusion of amyloid- $\beta$ -containing brain extract and by amyloid- $\beta$  deposition in APP  $\times$  Tau transgenic mice. *Am. J. Pathol.* 171, 2012–2020. doi:10.2353/ajpath.2007.070403
- Bookheimer, S.Y., Strojwas, M.H., Cohen, M.S., Saunders, A.M., Pericak-Vance, M.A., Mazziotta, J.C., Small, G.W., 2000. Patterns of brain activation in people at risk for Alzheimer's disease. *N. Engl. J. Med.* 343, 450–456. doi:10.1056/NEJM200008173430701
- Busche, M.A., Chen, X., Henning, H.A., Reichwald, J., Staufenbiel, M., Sakmann, B., Konnerth, A., 2012. Critical role of soluble amyloid- $\beta$  for early hippocampal hyperactivity in a mouse model of Alzheimer's disease. *Proc. Natl. Acad. Sci. U. S. A.* 109, 8740–8745. doi:10.1073/pnas.1206171109
- Busche, M.A., Kekuš, M., Adelsberger, H., Noda, T., Förstl, H., Nelken, I., Konnerth, A.,

2015. Rescue of long-range circuit dysfunction in Alzheimer's disease models. *Nat. Neurosci.* 18, 1623–1630. doi:10.1038/nn.4137
- Busche, M.A., Wegmann, S., Dujardin, S., Commins, C., Schiantarelli, J., Klickstein, N., Kamath, T. V., Carlson, G.A., Nelken, I., Hyman, B.T., 2019. Tau impairs neural circuits, dominating amyloid- $\beta$  effects, in Alzheimer models in vivo. *Nat. Neurosci.* 22, 57–64. doi:10.1038/s41593-018-0289-8
- Buzsáki, G., 2005. Theta rhythm of navigation: Link between path integration and landmark navigation, episodic and semantic memory. *Hippocampus* 15, 827–840. doi:10.1002/hipo.20113
- Buzsáki, G., 2002. Theta oscillations in the hippocampus. *Neuron* 33, 325–340.
- Cheng, I.H., Scarce-Lavie, K., Legleiter, J., Palop, J.J., Gerstein, H., Bien-Ly, N., Puolivali, J., Lesne, S., Ashe, K.H., Muchowski, P.J., Mucke, L., 2007. Accelerating amyloid- $\beta$  fibrillization reduces oligomer levels and functional deficits in Alzheimer disease mouse models. *J Biol Chem* 282, 23818–23828.
- Cissé, M., Sanchez, P.E., Kim, D.H., Ho, K., Yu, G.Q., Mucke, L., 2011. Ablation of cellular prion protein does not ameliorate abnormal neural network activity or cognitive dysfunction in the J20 line of human amyloid precursor protein transgenic mice. *J. Neurosci.* 31, 10427–10431. doi:10.1523/JNEUROSCI.1459-11.2011
- Colgin, L.L., Moser, E.I., 2010. Gamma oscillations in the hippocampus. *Physiology* 25, 319–329. doi:10.1152/physiol.00021.2010
- Dávila-Bouziguet, E., Targa-Fabra, G., Ávila, J., Soriano, E., Pascual, M., 2019. Differential accumulation of Tau phosphorylated at residues Thr231, Ser262 and Thr205 in hippocampal interneurons and its modulation by Tau mutations (VLW) and amyloid- $\beta$  peptide. *Neurobiol. Dis.* 125, 232–244. doi:10.1016/j.nbd.2018.12.006
- DeVos, S.L., Goncharoff, D.K., Chen, G., Kebodeaux, C.S., Yamada, K., Stewart, F.R., Schuler, D.R., Maloney, S.E., Wozniak, D.F., Rigo, F., Bennett, C.F., Cirrito, J.R., Holtzman, D.M., Miller, T.M., 2013. Antisense reduction of Tau in adult mice protects against seizures. *J. Neurosci.* 33, 12887–12897. doi:10.1523/JNEUROSCI.2107-13.2013
- Escribano, L., Simón, A.M., Pérez-Mediavilla, A., Salazar-Colocho, P., Río, J. Del, Frechilla, D., 2009. Rosiglitazone reverses memory decline and hippocampal glucocorticoid receptor down-regulation in an Alzheimer's disease mouse model. *Biochem. Biophys. Res. Commun.* 379, 406–410. doi:10.1016/j.bbrc.2008.12.071
- Essrich, C., Lorez, M., Benson, J.A., Fritschy, J.M., Lüscher, B., 1998. Postsynaptic clustering of major GABAA receptor subtypes requires the  $\gamma 2$  subunit and gephyrin. *Nat. Neurosci.* 1, 563–571. doi:10.1038/2798
- Etter, G., van der Veldt, S., Manseau, F., Zarrinkoub, I., Trillaud-Doppia, E., Williams, S., 2019. Optogenetic gamma stimulation rescues memory impairments in an Alzheimer's disease mouse model. *Nat. Commun.* 10, 5322. doi:10.1038/s41467-019-13260-9
- Fernández-Lamo, I., Sánchez-Campusano, R., Gruart, A., Delgado-García, J.M., 2016.

- Functional states of rat cortical circuits during the unpredictable availability of a reward-related cue. *Sci. Rep.* 6. doi:10.1038/srep37650
- Freund, T.F., Antal, M., 1988. GABA-containing neurons in the septum control inhibitory interneurons in the hippocampus. *Nature* 336, 170–173. doi:10.1038/336170a0
- Freund, T.F., Gulyás, A.I., 1997. Inhibitory control of GABAergic interneurons in the hippocampus. *Can J Physiol Pharmacol* 75, 479–487.
- Gangadharan, G., Shin, J., Kim, S.W., Kim, A., Paydar, A., Kim, D.S., Miyazaki, T., Watanabe, M., Yanagawa, Y., Kim, J., Kim, Y.S., Kim, D., Shin, H.S., 2016. Medial septal GABAergic projection neurons promote object exploration behavior and type 2 theta rhythm. *Proc. Natl. Acad. Sci. U. S. A.* 113, 6550–6555. doi:10.1073/pnas.1605019113
- García-Cabrero, A.M., Guerrero-López, R., Giráldez, B.G., Llorens-Martín, M., Ávila, J., Serratos, J.M., Sánchez, M.P., 2013. Hyperexcitability and epileptic seizures in a model of frontotemporal dementia. *Neurobiol. Dis.* 58, 200–208. doi:10.1016/j.nbd.2013.06.005
- Garner, H.L., Whittington, M.A., Henderson, Z., 2005. Induction by kainate of theta frequency rhythmic activity in the rat medial septum-diagonal band complex in vitro. *J Physiol* 564, 83–102.
- Götz, J., Chen, F., van Dorpe, J., Nitsch, R.M., 2001. Formation of neurofibrillary tangles in P301L tau transgenic mice induced by A $\beta$ 42 fibrils. *Science* (80-. ). 293, 1491–1495. doi:10.1126/science.1062097
- Götz, J., Probst, A., Spillantini, M.G., Schäfer, T., Jakes, R., Bürki, K., Goedert, M., 1995. Somatodendritic localization and hyperphosphorylation of tau protein in transgenic mice expressing the longest human brain tau isoform. *EMBO J.* 14, 1304–1313.
- Gruart, A., Muñoz, M.D., Delgado-García, J.M., 2006. Involvement of the CA3-CA1 synapse in the acquisition of associative learning in behaving mice. *J. Neurosci.* 26, 1077–1087. doi:10.1523/JNEUROSCI.2834-05.2006
- Gulyás, A.I., Gorcs, T.J., Freund, T.F., 1990. Innervation of different peptide-containing neurons in the hippocampus by GABAergic septal afferents. *Neuroscience* 37, 31–44.
- Haass, C., Selkoe, D.J., 2007. Soluble protein oligomers in neurodegeneration: lessons from the Alzheimer's amyloid  $\beta$ -peptide. *Nat. Rev. Mol. Cell Biol.* 8, 101–112. doi:10.1038/nrm2101
- Hangya, B., Borhegyi, Z., Szilagy, N., Freund, T.F., Varga, V., 2009. GABAergic neurons of the medial septum lead the hippocampal network during theta activity. *J Neurosci* 29, 8094–8102.
- Harris, J.A., Devidze, N., Halabisky, B., Lo, I., Thwin, M.T., Yu, G.-Q.Q., Bredesen, D.E., Masliah, E., Mucke, L., 2010. Many neuronal and behavioral impairments in transgenic mouse models of Alzheimer's disease are independent of caspase cleavage of the amyloid precursor protein. *J Neurosci* 30, 372–381. doi:10.1523/JNEUROSCI.5341-09.2010

- Horváth, A., Szűcs, A., Barcs, G., Noebels, J.L., Kamondi, A., 2016. Epileptic seizures in Alzheimer disease. *Alzheimer Dis. Assoc. Disord.* 30, 186–192.  
doi:10.1097/WAD.000000000000134
- Iaccarino, H.F., Singer, A.C., Martorell, A.J., Rudenko, A., Gao, F., Gillingham, T.Z., Mathys, H., Seo, J., Kritskiy, O., Abdurrob, F., Adaikkan, C., Canter, R.G., Rueda, R., Brown, E.N., Boyden, E.S., Tsai, L.-H., 2016. Gamma frequency entrainment attenuates amyloid load and modifies microglia. *Nature* 540, 230–235.  
doi:10.1038/nature20587
- Ittner, L.M., Ke, Y.D., Delerue, F., Bi, M., Gladbach, A., van Eersel, J., Wölfing, H., Chieng, B.C., Christie, M.J., Napier, I.A., Eckert, A., Staufienbiel, M., Hardeman, E., Götz, J., 2010. Dendritic function of Tau mediates amyloid- $\beta$  toxicity in Alzheimer's disease mouse models. *Cell* 142, 387–397. doi:10.1016/j.cell.2010.06.036
- Jin, M., Shepardson, N., Yang, T., Chen, G., Walsh, D., Selkoe, D.J., 2011. Soluble amyloid  $\beta$ -protein dimers isolated from Alzheimer cortex directly induce Tau hyperphosphorylation and neuritic degeneration. *Proc. Natl. Acad. Sci. U. S. A.* 108, 5819–5824. doi:10.1073/pnas.1017033108
- Lewis, J., Dickson, D.W., Lin, W., Chisholm, L., Corral, A., Jones, G., Yen, S., Sahara, N., Skipper, L., Yager, D., Eckman, C., Hardy, J., Hutton, M., McGowan, E., 2001. Enhanced Neurofibrillary Degeneration in Transgenic Mice Expressing Mutant Tau and APP. *Science* (80-. ). 293, 1487–1491. doi:10.1126/science.1058189
- Lim, F., Hernández, F., Lucas, J.J., Gómez-Ramos, P., Morán, M. a, Avila, J., 2001. FTDP-17 mutations in tau transgenic mice provoke lysosomal abnormalities and Tau filaments in forebrain. *Mol. Cell. Neurosci.* 18, 702–714.  
doi:10.1006/mcne.2001.1051
- Mably, A.J., Colgin, L.L., 2018. Gamma oscillations in cognitive disorders. *Curr. Opin. Neurobiol.* 52, 182–187. doi:10.1016/j.conb.2018.07.009
- Maric, H.M., Hausrat, T.J., Neubert, F., Dalby, N.O., Doose, S., Sauer, M., Kneussel, M., Strømgaard, K., 2017. Gephyrin-binding peptides visualize postsynaptic sites and modulate neurotransmission. *Nat. Chem. Biol.* 13, 153–160.  
doi:10.1038/nchembio.2246
- Mátyás, F., Freund, T.F., Gulyás, A.I., 2004. Immunocytochemically defined interneuron populations in the hippocampus of mouse strains used in transgenic technology. *Hippocampus* 14, 460–481. doi:10.1002/hipo.10191
- Mucke, L., Masliah, E., Yu, G.Q., Mallory, M., Rockenstein, E.M., Tatsuno, G., Hu, K., Kholodenko, D., Johnson-Wood, K., McConlogue, L., 2000. High-level neuronal expression of A $\beta$ 1-42 in wild-type human amyloid protein precursor transgenic mice: synaptotoxicity without plaque formation. *J. Neurosci.* 20, 4050–4058.
- Múnica, A., Gruart, A., Muñoz, M.D., Delgado-García, J.M., Munera, A., Gruart, A., Muñoz, M.D., Delgado-García, J.M., 2000. Scopolamine impairs information processing in the hippocampus and performance of a learned eyeblink response in alert cats. *Neurosci Lett* 292, 33–36.
- Navarro, P., Guerrero, R., Gallego, E., Avila, J., Luquin, R., Ruiz, P.J.G., Sanchez, M.P.,

2008. Memory and exploratory impairment in mice that lack the Park-2 gene and that over-express the human FTDP-17 mutant Tau. *Behav. Brain Res.* 189, 350–356. doi:10.1016/j.bbr.2008.01.017
- Nisbet, R.M., Polanco, J.-C., Ittner, L.M., Götz, J., 2015. Tau aggregation and its interplay with amyloid- $\beta$ . *Acta Neuropathol.* 129, 207–220. doi:10.1007/s00401-014-1371-2
- Palop, J.J., Chin, J., Roberson, E.D., Wang, J., Thwin, M.T., Bien-Ly, N., Yoo, J., Ho, K.O., Yu, G.Q., Kreitzer, A., Finkbeiner, S., Noebels, J.L., Mucke, L., 2007. Aberrant excitatory neuronal activity and compensatory remodeling of inhibitory hippocampal circuits in mouse models of Alzheimer’s disease. *Neuron* 55, 697–711. doi:10.1016/j.neuron.2007.07.025
- Palop, J.J., Mucke, L., 2016. Network abnormalities and interneuron dysfunction in Alzheimer disease. *Nat. Rev. Neurosci.* 17, 777–792. doi:10.1038/nrn.2016.141
- Palop, J.J., Mucke, L., 2010. Amyloid- $\beta$ -induced neuronal dysfunction in Alzheimer’s disease: from synapses toward neural networks. *Nat Neurosci* 13, 812–818.
- Pascual, M., Pérez-Sust, P., Soriano, E., 2004. The GABAergic septohippocampal pathway in control and reeler mice: Target specificity and termination onto reelin-expressing interneurons. *Mol. Cell. Neurosci.* 25, 679–691. doi:10.1016/j.mcn.2003.12.009
- Paxinos, G., Franklin, K.B.J., 2001. *The mouse brain in stereotaxic coordinates*, 2nd ed. Academic, San Diego, Calif. London. doi:10.1016/S0306-4530(03)00088-X
- Pérez, M., Ribe, E., Rubio, A., Lim, F., Morán, M. a., Ramos, P.G., Ferrer, I., Isla, M.T.G., Ávila, J., 2005. Characterization of a double (amyloid precursor protein-tau) transgenic: Tau phosphorylation and aggregation. *Neuroscience* 130, 339–347. doi:10.1016/j.neuroscience.2004.09.029
- Pouille, F., Scanziani, M., 2001. Enforcement of temporal fidelity in pyramidal cells by somatic feed-forward inhibition. *Science* (80-. ). 293, 1159–1163. doi:10.1126/science.1060342
- Puighermanal, E., Marsicano, G., Busquets-Garcia, A., Lutz, B., Maldonado, R., Ozaita, A., 2009. Cannabinoid modulation of hippocampal long-term memory is mediated by mTOR signaling. *Nat. Neurosci.* 12, 1152–1158. doi:10.1038/nn.2369
- Quiroz, Y.T., Budson, A.E., Celone, K., Ruiz, A., Newmark, R., Castrillón, G., Lopera, F., Stern, C.E., 2010. Hippocampal hyperactivation in presymptomatic familial Alzheimer’s disease. *Ann. Neurol.* 68, 865–875. doi:10.1002/ana.22105
- Reiman, E.M., Quiroz, Y.T., Fleisher, A.S., Chen, K., Velez-Pardo, C., Jimenez-Del-Rio, M., Fagan, A.M., Shah, A.R., Alvarez, S., Arbelaez, A., Giraldo, M., Acosta-Baena, N., Sperling, R.A., Dickerson, B., Stern, C.E., Tirado, V., Munoz, C., Reiman, R.A., Huentelman, M.J., Alexander, G.E., Langbaum, J.B.S., Kosik, K.S., Tariot, P.N., Lopera, F., 2012. Brain imaging and fluid biomarker analysis in young adults at genetic risk for autosomal dominant Alzheimer’s disease in the presenilin 1 E280A kindred: A case-control study. *Lancet Neurol.* 11, 1048–1056. doi:10.1016/S1474-4422(12)70228-4

- Ribé, E.M., Pérez, M., Puig, B., Gich, I., Lim, F., Cuadrado, M., Sesma, T., Catena, S., Sánchez, B., Nieto, M., Gómez-Ramos, P., Morán, M.A., Cabodevilla, F., Samaranch, L., Ortiz, L., Pérez, A., Ferrer, I., Avila, J., Gómez-Isla, T., 2005. Accelerated amyloid deposition, neurofibrillary degeneration and neuronal loss in double mutant APP/tau transgenic mice. *Neurobiol Dis* 20, 814–822.
- Roberson, E.D., Searce-Levie, K., Palop, J.J., Yan, F., Cheng, I.H., Wu, T., Gerstein, H., Yu, G.-Q.Q., Mucke, L., 2007. Reducing endogenous tau ameliorates amyloid  $\beta$ -induced deficits in an Alzheimer's disease mouse model. *Science* (80-. ). 316, 750–754. doi:10.1126/science.1141736
- Rocamora, N., Pascual, M., Acsady, L., deLecea, L., Freund, T.F., Soriano, E., Acsàdy, L., de Lecea, L., Freund, T.F., Soriano, E., 1996. Expression of NGF and NT3 mRNAs in hippocampal interneurons innervated by the GABAergic septohippocampal pathway. *J. Neurosci.* 16, 3991–4004.
- Rodríguez-Navarro, J.A., Gómez, A., Rodal, I., Perucho, J., Martínez, A., Furió, V., Ampuero, I., Casarejos, M.J., Solano, R.M., de Yébenes, J.G., Mena, M.A., 2008. Parkin deletion causes cerebral and systemic amyloidosis in human mutated tau over-expressing mice. *Hum. Mol. Genet.* 17, 3128–3143. doi:10.1093/hmg/ddn210
- Rossi, D., Gruart, A., Contreras-Murillo, G., Muhaisen, A., Ávila, J., Delgado-García, J.M., Pujadas, L., Soriano, E., 2020. Reelin reverts biochemical, physiological and cognitive alterations in mouse models of Tauopathy. *Prog. Neurobiol.* 186, 101743. doi:10.1016/j.pneurobio.2019.101743
- Rubio, S.E., Martínez, A., Chauvet, S., Mann, F., Soriano, E., Pascual, M., 2011. Semaphorin 3C is not required for the establishment and target specificity of the GABAergic septohippocampal pathway in vitro. *Eur. J. Neurosci.* 34, 1923–1933. doi:10.1111/j.1460-9568.2011.07906.x
- Rubio, S.E., Vega-Flores, G., Martínez, A., Bosch, C., Pérez-Mediavilla, A., del Río, J., Gruart, A., Delgado-García, J.M., Soriano, E., Pascual, M., 2012. Accelerated aging of the GABAergic septohippocampal pathway and decreased hippocampal rhythms in a mouse model of Alzheimer's disease. *FASEB J.* 26, 4458–4467. doi:10.1096/fj.12-208413
- Schindelin, J., Arganda-Carreras, I., Frise, E., Kaynig, V., Longair, M., Pietzsch, T., Preibisch, S., Rueden, C., Saalfeld, S., Schmid, B., Tinevez, J.-Y., White, D.J., Hartenstein, V., Eliceiri, K., Tomancak, P., Cardona, A., 2012. Fiji: an open-source platform for biological-image analysis. *Nat. Methods* 9, 676–682. doi:10.1038/nmeth.2019
- Selkoe, D.J., Hardy, J., 2016. The amyloid hypothesis of Alzheimer's disease at 25 years. *EMBO Mol. Med.* 8, 595–608. doi:10.15252/emmm.201606210
- Shimojo, M., Takuwa, H., Takado, Y., Tokunaga, M., Tsukamoto, S., Minatohara, K., Ono, M., Seki, C., Maeda, J., Urushihata, T., Minamihisamatsu, T., Aoki, I., Kawamura, K., Zhang, M.R., Sahara, T., Sahara, N., Higuchi, M., 2020. Selective disruption of inhibitory synapses leading to neuronal hyperexcitability at an early stage of tau pathogenesis in a mouse model. *J. Neurosci.* 40, 3491–3501. doi:10.1523/JNEUROSCI.2880-19.2020

- Sohal, V.S., Zhang, F., Yizhar, O., Deisseroth, K., 2009. Parvalbumin neurons and gamma rhythms enhance cortical circuit performance. *Nature* 459, 698–702.  
doi:10.1038/nature07991
- Soler, H., Dorca-Arévalo, J., González, M., Rubio, S.E.S.E., Ávila, J., Soriano, E., Pascual, M., Avila, J., Soriano, E., Pascual, M., 2017. The GABAergic septohippocampal connection is impaired in a mouse model of tauopathy. *Neurobiol. Aging* 49, 40–51. doi:10.1016/j.neurobiolaging.2016.09.006
- Sotty, F., Danik, M., Manseau, F., Laplante, F., Quirion, R., Williams, S., 2003. Distinct electrophysiological properties of glutamatergic, cholinergic and GABAergic rat septohippocampal neurons: novel implications for hippocampal rhythmicity. *J Physiol* 551, 927–943.
- Tóth, K., Freund, T.F., Miles, R., 1997. Disinhibition of rat hippocampal pyramidal cells by GABAergic afferents from the septum. *J. Physiol.* 500 (Pt 2), 463–74.  
doi:10.1113/jphysiol.1997.sp022033
- Tyagarajan, S.K., Fritschy, J.-M., 2014. Gephyrin: a master regulator of neuronal function? *Nat. Rev. Neurosci.* 15, 141–156. doi:10.1038/nrn3670
- Tyagarajan, S.K., Ghosh, H., Yévenes, G.E., Nikonenko, I., Ebeling, C., Schwerdel, C., Sidler, C., Zeilhofer, H.U., Gerrits, B., Muller, D., Fritschy, J.M., 2011. Regulation of GABAergic synapse formation and plasticity by GSK3 $\beta$ -dependent phosphorylation of gephyrin. *Proc. Natl. Acad. Sci. U. S. A.* 108, 379–384.  
doi:10.1073/pnas.1011824108
- Varga, V., Hangya, B., Kranitz, K., Ludanyi, A., Zemankovics, R., Katona, I., Shigemoto, R., Freund, T.F., Borhegyi, Z., 2008. The presence of pacemaker HCN channels identifies theta rhythmic GABAergic neurons in the medial septum. *J Physiol* 586, 3893–3915.
- Varga, V., Losonczy, A., Zemelman, B. V, Borhegyi, Z., Nyiri, G., Domonkos, A., Hangya, B., Holderith, N., Magee, J.C., Freund, T.F., 2009. Fast synaptic subcortical control of hippocampal circuits. *Science* (80-. ). 326, 449–453.
- Vega-Flores, G., Rubio, S.E., Jurado-Parras, M.T., Gomez-Climent, M.A., Hampe, C.S., Manto, M., Soriano, E., Pascual, M., Gruart, A., Delgado-Garcia, J.M., 2014. The GABAergic septohippocampal pathway is directly involved in internal processes related to operant reward learning. *Cereb. Cortex* 24, 2093–2107.  
doi:10.1093/cercor/bht060
- Verret, L., Mann, E.O., Hang, G.B., Barth, A.M.I., Cobos, I., Ho, K., Devidze, N., Masliah, E., Kreitzer, A.C., Mody, I., Mucke, L., Palop, J.J., 2012. Inhibitory interneuron deficit links altered network activity and cognitive dysfunction in Alzheimer model. *Cell* 149, 708–721. doi:10.1016/j.cell.2012.02.046
- Vertes, R.P., 2005. Hippocampal theta rhythm: a tag for short-term memory. *Hippocampus* 15, 923–935.
- Villette, V., Dutar, P., 2016. GABAergic microcircuits in Alzheimer’s disease models. *Curr. Alzheimer Res.* 14, 30–39. doi:10.2174/1567205013666160819125757



Webster, S.J., Bachstetter, A.D., Nelson, P.T., Schmitt, F.A., Van Eldik, L.J., 2014. Using mice to model Alzheimer's dementia: an overview of the clinical disease and the preclinical behavioral changes in 10 mouse models. *Front. Genet.* 5, 88. doi:10.3389/fgene.2014.00088

Whitehouse, P.J., Price, D.L., Struble, R.G., Clark, A.W., Coyle, J.T., Delon, M.R., 1982. Alzheimer's disease and senile dementia: loss of neurons in the basal forebrain. *Science* (80- ). 215, 1237–1239.

Ypsilanti, A.R., Girao da Cruz, M.T., Burgess, A., Aubert, I., 2008. The length of hippocampal cholinergic fibers is reduced in the aging brain. *Neurobiol Aging* 29, 1666–1679.

Zempel, H., Thies, E., Mandelkow, E., Mandelkow, E.-M., 2010. A $\beta$  oligomers cause localized Ca<sup>2+</sup> elevation, missorting of endogenous Tau into dendrites, Tau phosphorylation, and destruction of microtubules and spines. *J. Neurosci.* 30, 11938–11950. doi:10.1523/JNEUROSCI.2357-10.2010

## Figure Legends

**Figure 1. No recognition memory deficits are present in J20/VLW mice. (A)** Protocol for novel object-recognition test. The time spent exploring each of the objects during the test phase was computed to calculate a discrimination index. **(B)** Discrimination index in novel object-recognition test of 8 mo WT ( $n = 9$ ), J20 ( $n = 6$ ), VLW ( $n = 7$ ), and J20/VLW ( $n = 5$ ) mice. **(C)** Total exploration time in novel object-recognition test. For (C): one-way ANOVA,  $*p < .05$ . Error bars represent SEM.

**Figure 2. A $\beta$  plaque load of J20/VLW mice is similar to that of J20 animals. Immunodetection of A $\beta$  plaques with 3D6 antibody in hippocampal sections from 8 mo and 12 mo J20 and J20/VLW mice. (A, B, D and E)** Accumulation of A $\beta$  plaques in the hippocampus of 8 mo (A and B) and 12 mo (D and E) J20 and J20/VLW mice. **(C and F)** Quantification of the percentage of A $\beta$  plaques in the hippocampus of 8 mo (C) and 12 mo (F) J20 and J20/VLW animals. For (C) and (F): Student's *t*-test.  $n = 4$  animals per group, 3 sections per animal. Error bars represent SEM. Scale bar: 500  $\mu$ m.

**Figure 3. Pyramidal neurons of VLW and J20/VLW mice accumulate similar amounts of pThr231 and pThr205 Tau. Immunodetection and quantification of pThr231 and pThr205 Tau-positive signal in hippocampal sections from 8 mo VLW and J20/VLW mice. (A-D)** pThr231 (A and C) and pThr205 Tau (B and D) accumulation in pyramidal neurons in the CA1 region of the hippocampus of VLW and J20/VLW mice. **(E and F)** Quantification of the mean gray value of pThr231 (E) and pThr205 Tau (F) signal in the pyramidal layer of VLW and J20/VLW animals. For (E) and (F): Student's *t*-test.  $n = 3-4$  animals per group, 3 sections per animal. Error bars represent SEM. Abbreviations: so, *stratum oriens*; sp, *stratum pyramidale*; sr, *stratum radiatum*. Scale bar: 100  $\mu$ m.

**Figure 4. Increased density of hippocampal interneurons accumulating P-Tau in J20/VLW mice, which accumulate A $\beta$  peptide, compared with VLW animals. Immunodetection and cell density quantification of pThr231, pThr205, and pSer262 Tau-positive cells in hippocampal sections from 8 mo WT, J20, VLW, and J20/VLW mice. (A-F)** Accumulation of pThr231 (A and D), pThr205 (B and E), and pSer262 Tau (C and F) in hippocampal interneurons (arrows) in the CA1 region of the hippocampus of VLW and J20/VLW mice. **(G)** Density quantification of pThr231 Tau-positive interneurons in the hippocampus of VLW and J20/VLW mice. **(H and I)** Density quantification of pThr205 (H) and pSer262 (I) Tau-positive interneurons in the hippocampus of WT, J20, VLW, and J20/VLW mice. For (G): Welch's *t*-test. For (H) and (I): one-way ANOVA,  $*p < .05$ ,  $**p < .01$ .  $n = 4$  animals per group, 3 sections per animal. Error bars represent SEM. Abbreviations: so, *stratum oriens*; sp, *stratum pyramidale*; sr, *stratum radiatum*. Scale bar: 100  $\mu$ m.

**Figure 5. pThr231 Tau accumulates in PV-positive interneurons, and pThr205 and pSer262 Tau in PV-, CR-, and CB-positive interneurons in J20/VLW mice. Double immunofluorescent detection of pThr231, pThr205, or pSer262 and interneuron markers PV, CR, or CB in hippocampal sections from 8 mo J20/VLW mice. (A-C)** PV-positive hippocampal interneurons of J20/VLW mice (magenta, A) accumulate Tau phosphorylated at residue Thr231 (green, B). Colocalization of pThr231 Tau with PV-positive interneurons (arrows in C). **(D-I)** PV- and CR-positive hippocampal interneurons of J20/VLW mice (magenta, D

and G) accumulate Tau phosphorylated at residue Ser262 (green, E and H). Colocalization of pSer262 Tau with PV- (arrows in F) and CR-positive interneurons (arrows in I). (J-L) CB-positive hippocampal interneurons of J20/VLW mice (magenta, J) accumulate Tau phosphorylated at residue Thr205 (green, K). Colocalization of pThr205 Tau with CB-positive interneurons (arrows in L). Abbreviations: CB, Calbindin; CR, Calretinin; PV, Parvalbumin; so, *stratum oriens*; sp, *stratum pyramidale*; sr, *stratum radiatum*. Scale bar: 50  $\mu$ m.

**Figure 6. GABAergic SH innervation on GAD-positive cells is preserved in 8 mo J20/VLW mice. Double immunodetection of GABAergic SH fibers and GAD-positive cells in hippocampal sections from 8 mo WT and J20/VLW mice. (A and B) GABAergic SH fibers contacting GAD-positive cells (arrows) in the CA3 region of WT (A) and J20/VLW (B) mice. (C-F) GABAergic SH baskets forming synaptic boutons (black) on the soma of GAD-positive cells (brown) in WT (C and D) and J20/VLW (E and F) mice. (G and H) Representation of the percentage of change in the percentage of GAD-positive cells contacted by GABAergic SH fibers, and in the complexity of GABAergic SH contacts, comparing the four experimental groups.  $n = 4$  animals per group, 3 sections per animal. Abbreviations: GAD, glutamic acid decarboxylase; so, *stratum oriens*; sp, *stratum pyramidale*; sr, *stratum radiatum*. Scale bar: 150  $\mu$ m (A and B), 10  $\mu$ m (C-F).**

**Figure 7. GABAergic SH innervation on PV-positive cells is preserved in 8 mo J20/VLW mice. Double immunodetection of GABAergic SH fibers and PV-positive cells in hippocampal sections from 8 mo WT and J20/VLW mice. (A and B) GABAergic SH fibers contacting PV-positive cells (arrows) in the CA3 region of WT (A) and J20/VLW (B) mice. (C-F) GABAergic SH baskets forming synaptic boutons (black) on the soma of PV-positive cells (brown) in WT (C and D) and J20/VLW (E and F) mice. (G and H) Representation of the percentage of change in the percentage of PV-positive cells contacted by GABAergic SH fibers, and in the complexity of GABAergic SH contacts, comparing the four experimental groups.  $n = 4$  animals per group, 3 sections per animal. Abbreviations: PV, Parvalbumin; so, *stratum oriens*; sp, *stratum pyramidale*; sr, *stratum radiatum*. Scale bar: 150  $\mu$ m (A and B), 10  $\mu$ m (C-F).**

**Figure 8. No alterations in GABAergic SH innervation are observed in 12 mo J20/VLW mice. Double immunodetection of GABAergic SH fibers and GAD- or PV-positive cells in hippocampal sections from 12 mo WT and J20/VLW mice. (A and B) GABAergic SH fibers (black) contacting GAD-positive cells (brown, arrows) in the CA3 region of WT (A) and J20/VLW (B) mice. (C-F) GABAergic SH baskets forming synaptic boutons on the soma of GAD-positive cells in WT (C and D) and J20/VLW (E and F) mice. (G-J) GABAergic SH baskets forming synaptic boutons on the soma of PV-positive cells in WT (G and H) and J20/VLW (I and J) mice. (K and L) Quantification of the percentage of GAD- and PV-positive cells contacted by GABAergic SH fibers (K), and the complexity of GABAergic SH contacts (L), in WT and J20/VLW mice. For (K) and (L): Student's *t*-test.  $n = 4-5$  animals per group, 3 sections per animal. Error bars represent SEM. Abbreviations: GAD, glutamic acid decarboxylase; PV, Parvalbumin; so, *stratum oriens*; sp, *stratum pyramidale*; sr, *stratum radiatum*. Scale bar: 150  $\mu$ m (A and B), 10  $\mu$ m (C-J).**

**Figure 9. No loss of hippocampal GABAergic interneurons is observed in J20/VLW mice. Immunodetection and cell density quantification of the total GABAergic interneuron population (GAD-positive cells) and the PV-positive interneuron subpopulation in hippocampal sections from 8 mo and 12 mo WT and J20/VLW mice. (A and B, D and E) GAD- (A and B) and PV-positive cells (D and E) in the CA1 region of the hippocampus of 8 mo WT (A) and J20/VLW (B) mice. (C and D) Density quantification of GAD-positive cells in the hippocampus of 8 mo (C) and 12 mo (D) WT and J20/VLW mice. (G and H) Density quantification of PV-positive cells in the hippocampus of 8 mo (G) and 12 mo (H) WT and J20/VLW mice. For (C), (D), (G), and (H): Student's *t*-test. *n* = 4–5 animals per group, 3 sections per animal. Error bars represent SEM. Abbreviations: GAD, glutamic acid decarboxylase; PV, Parvalbumin; so, *stratum oriens*; sp, *stratum pyramidale*; sr, *stratum radiatum*. Scale bar: 100  $\mu$ m.**

**Figure 10. Hippocampal oscillations, which are markedly impaired in J20 and VLW animals, are rescued in J20/VLW mice. (A and B) Representative examples of LFP activity recorded in the CA1 region of the hippocampus of 8 mo WT and J20/VLW mice located in either a small (A) or a large (B) box. (C and D) Spectral powers were computed from similar records collected from 8 mo WT, J20, VLW, and J20/VLW mice. Histograms representing the percent decrease in spectral power for theta (C) and gamma (D) bands, comparing J20, VLW, and J20/VLW mice to WT animals. *n* = 4 animals per group.**

**Supplementary Figure 1. No major alterations in anxiety or motor coordination are present in J20/VLW mice. (A and B) Anxiety-like behavior was assessed using the elevated plus-maze and no significant differences were observed in either the percentage of entries into the open arms (A) or the total entries into closed and open arms (B) between the four experimental groups. (C and D) Motor coordination was measured using the accelerating rotarod and no alterations were observed in either the latency to fall (C) or the maximum speed (D) between the four experimental groups. All behavioral tests were performed on 8 mo WT (*n* = 9), J20 (*n* = 6), VLW (*n* = 7), and J20/VLW (*n* = 5) mice. Error bars represent SEM.**

**Supplementary Figure 2. No loss of GABAergic SH neurons is observed in J20/VLW mice. Immunodetection of GABAergic SH neurons with PV antibody in septal sections from 8 mo WT and J20/VLW mice. (A and B) GABAergic SH cells, which express PV, in the MSDB complex of WT (A) and J20/VLW mice (B). (C) Density quantification of PV-positive cells in the MSDB complex of WT and J20/VLW mice. For (C): Student's *t*-test. *n* = 4 animals per group, 4 sections per animal. Error bars represent SEM. Abbreviations: DB, nucleus of the diagonal band of Broca; MS, medial septal nucleus; PV, Parvalbumin. Scale bar: 300  $\mu$ m.**

**A** NOVEL OBJECT-RECOGNITION TEST

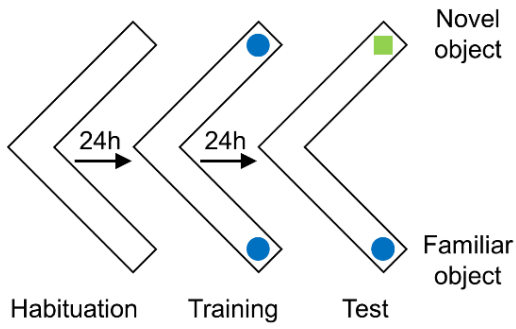

**B**

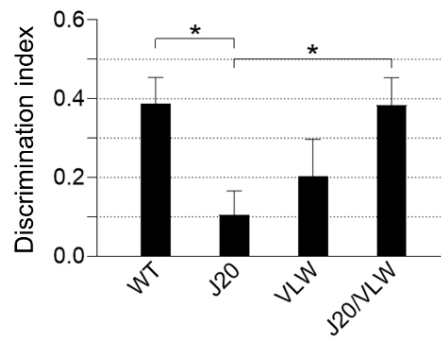

**C**

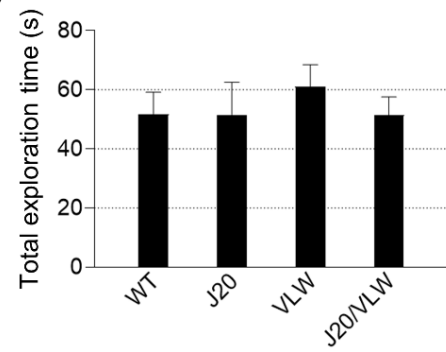

Figure 1

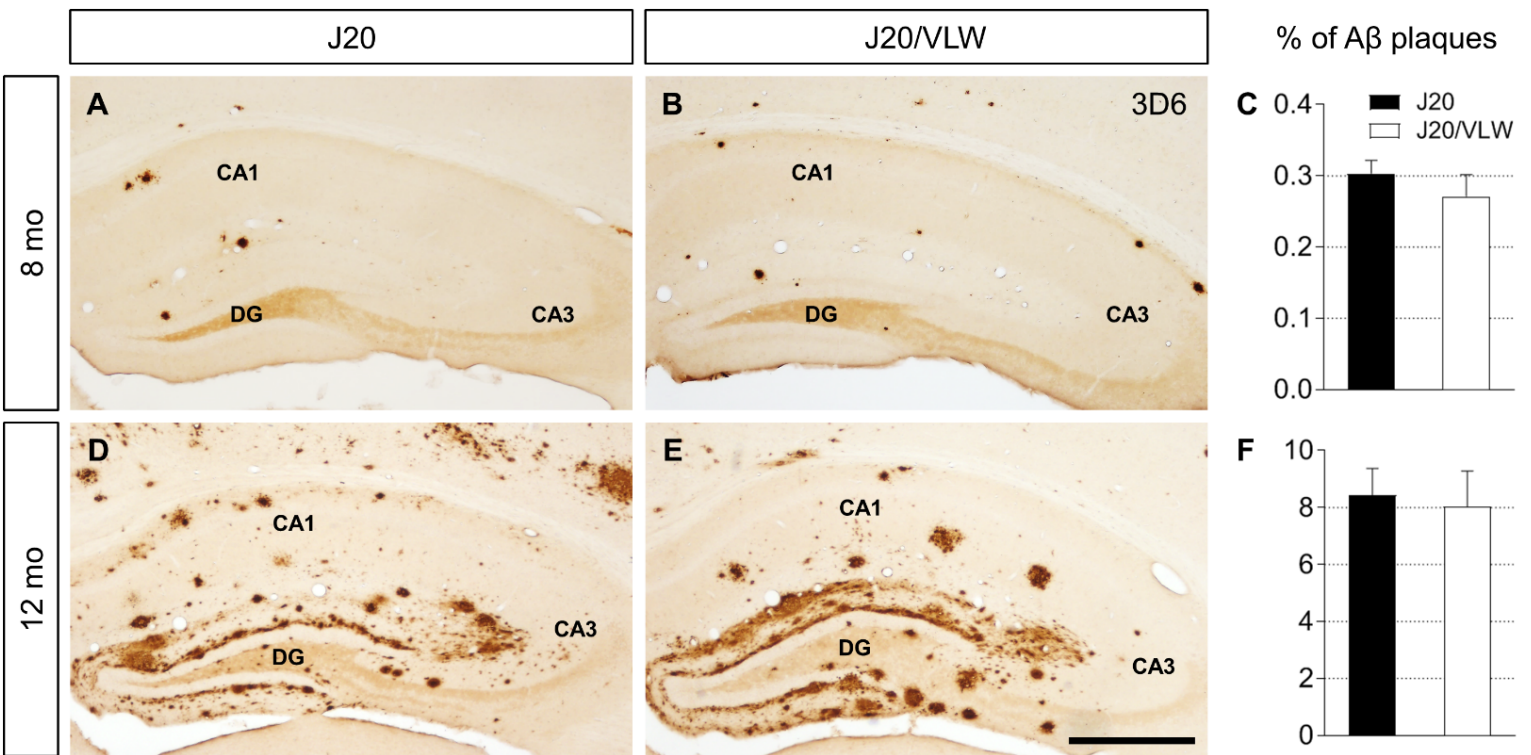

Figure 2

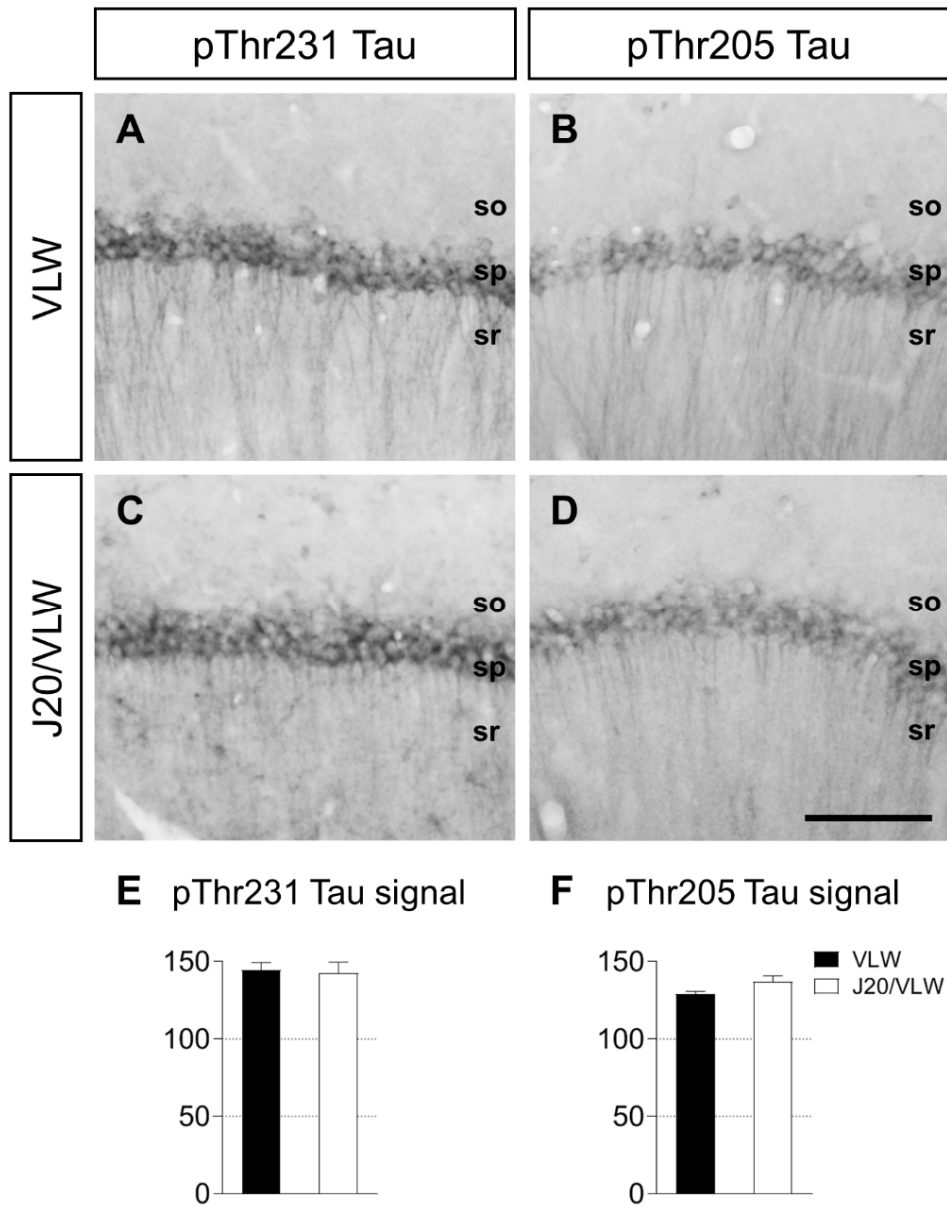

Figure 3

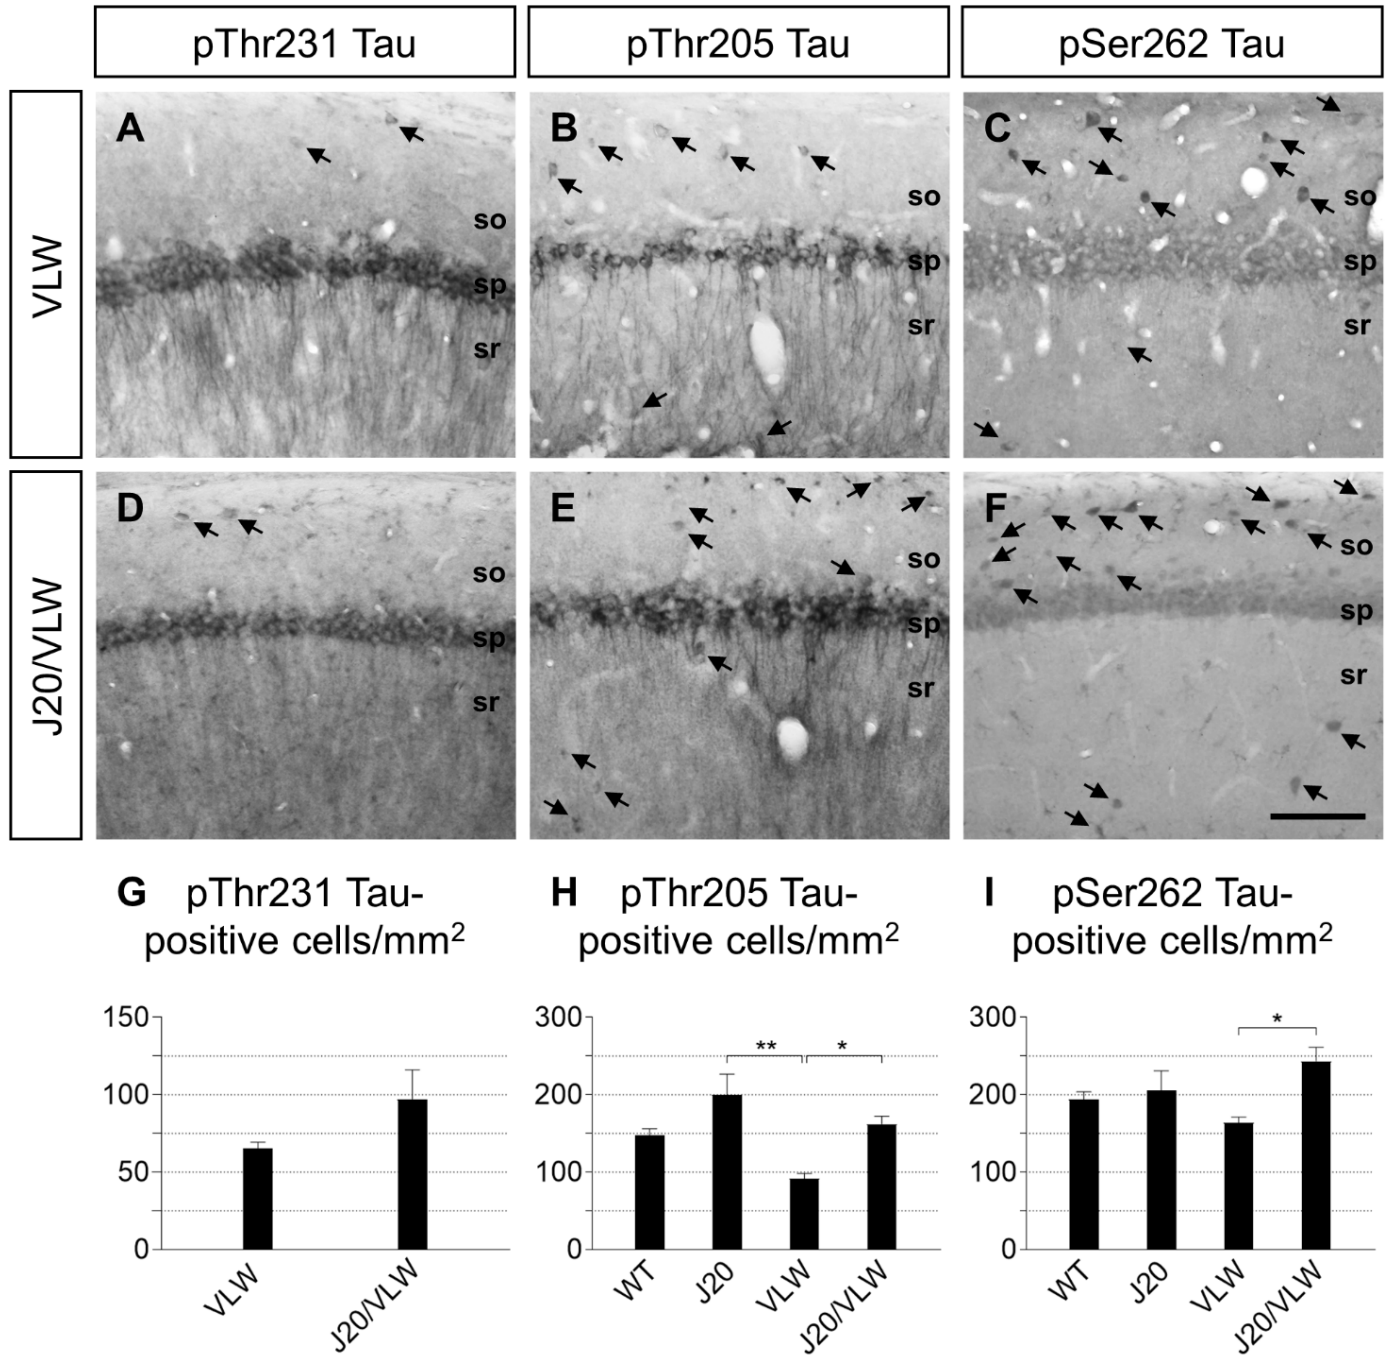

Figure 4



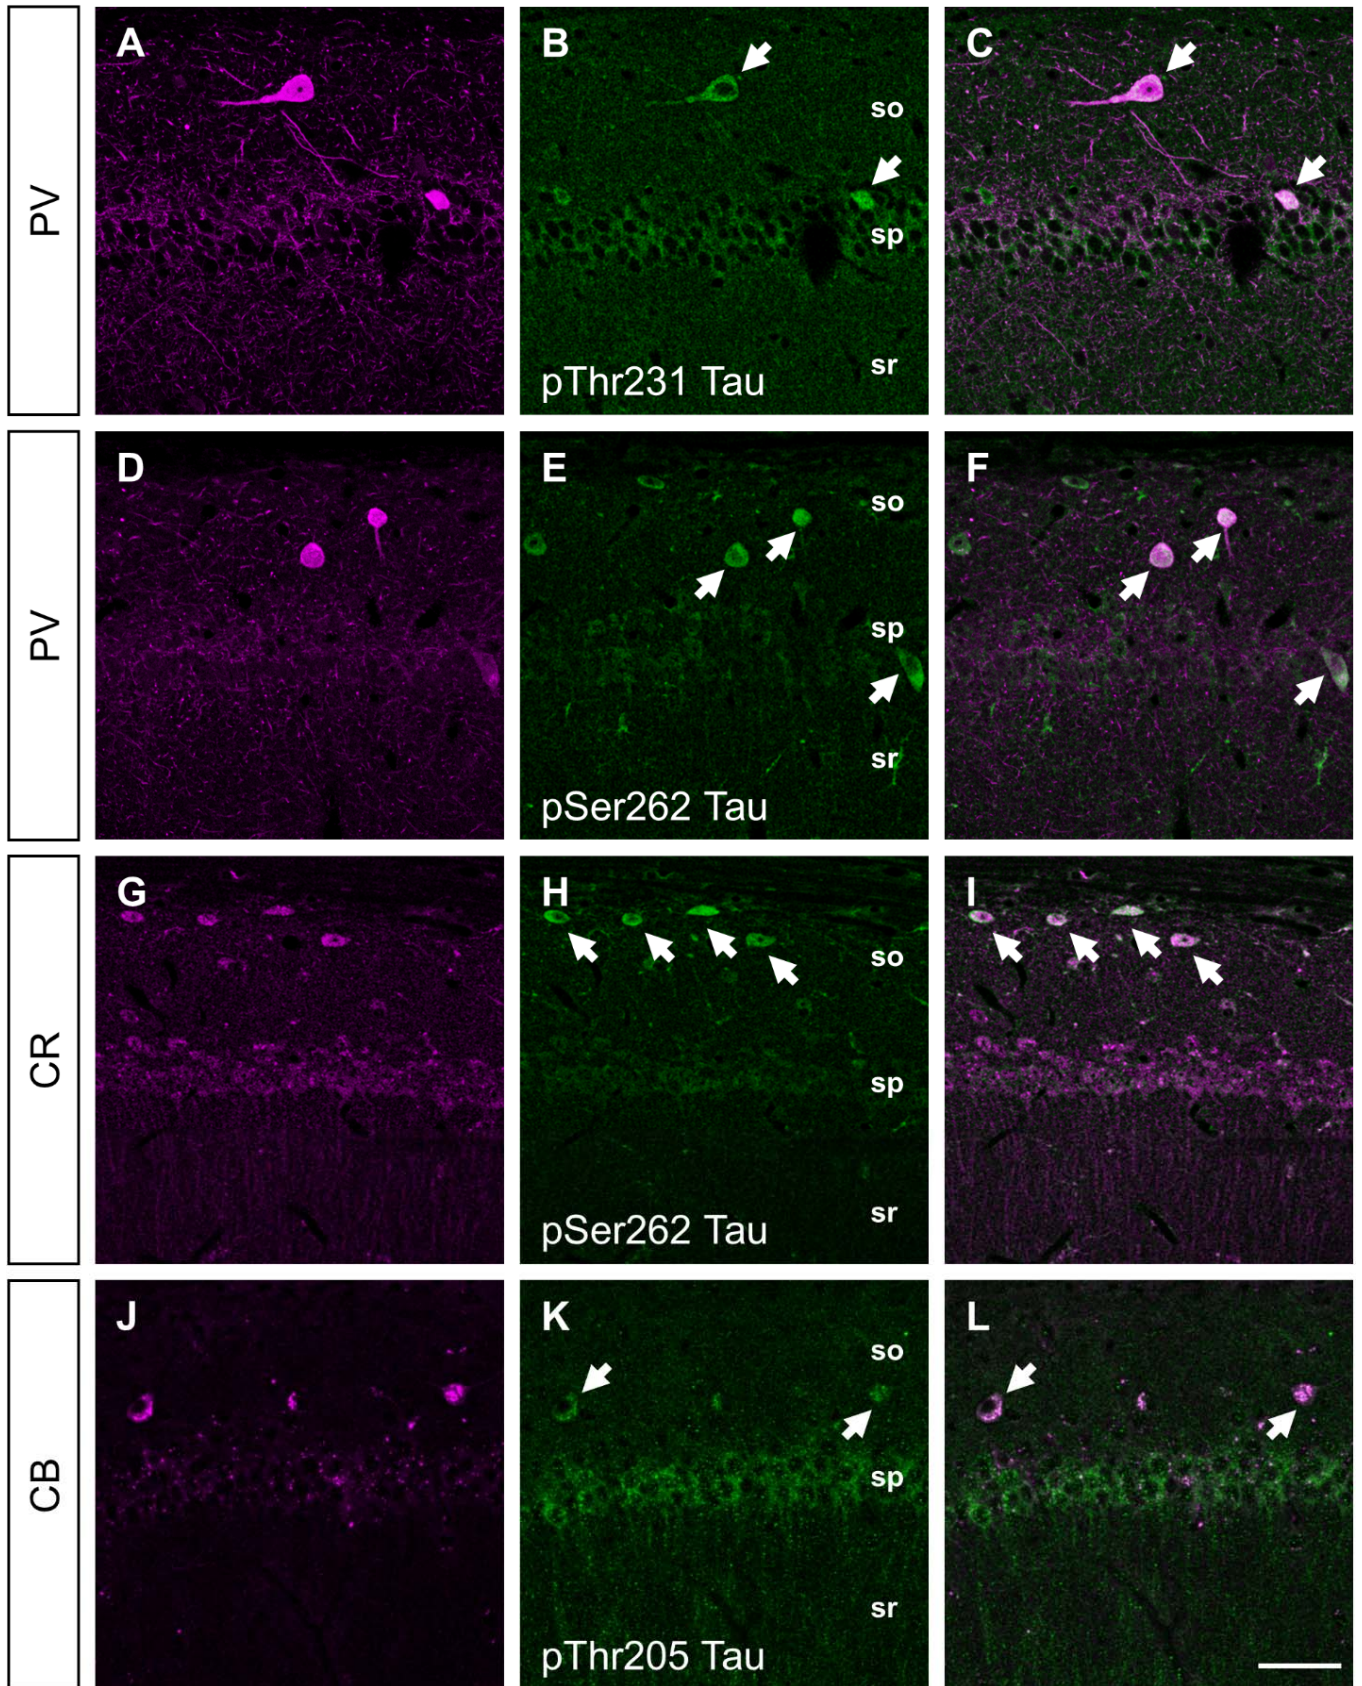

Figure 5

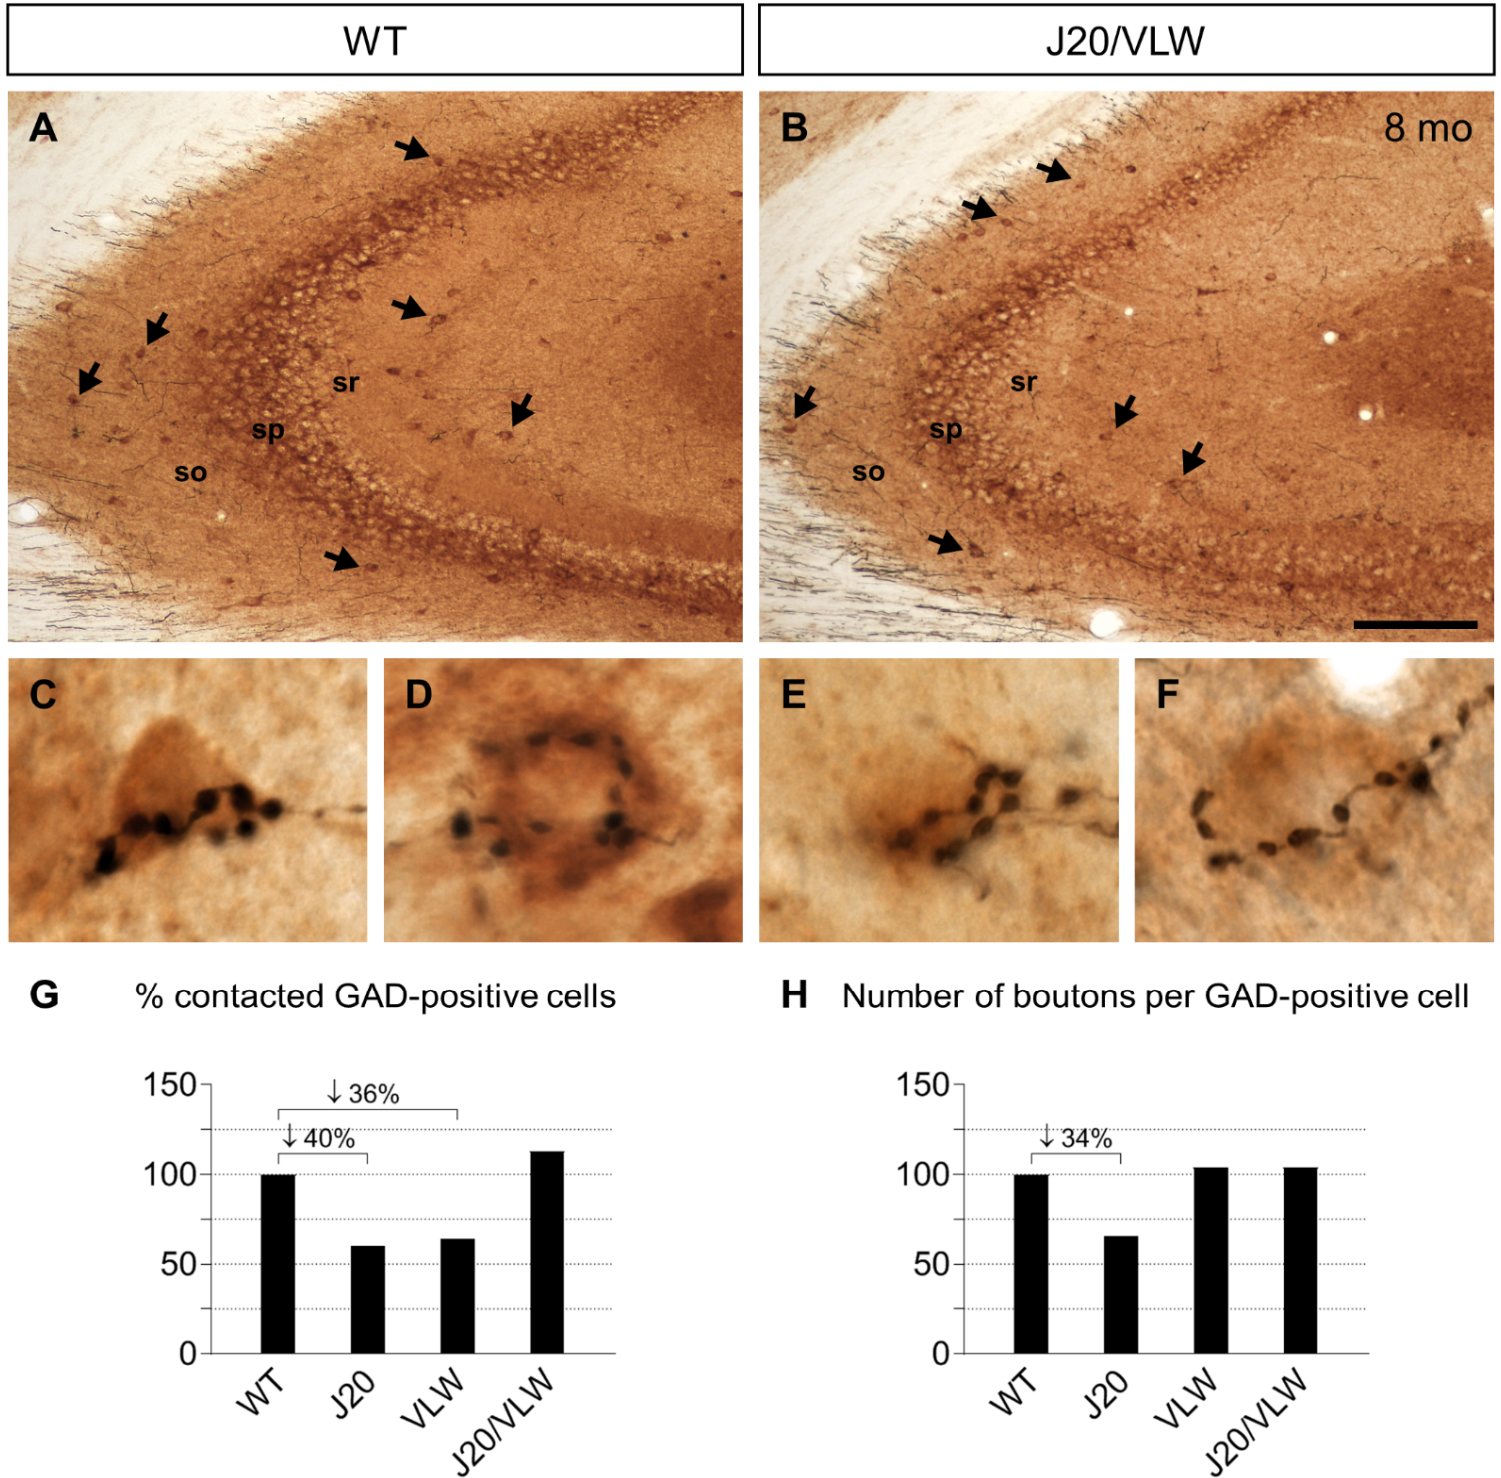

Figure 6

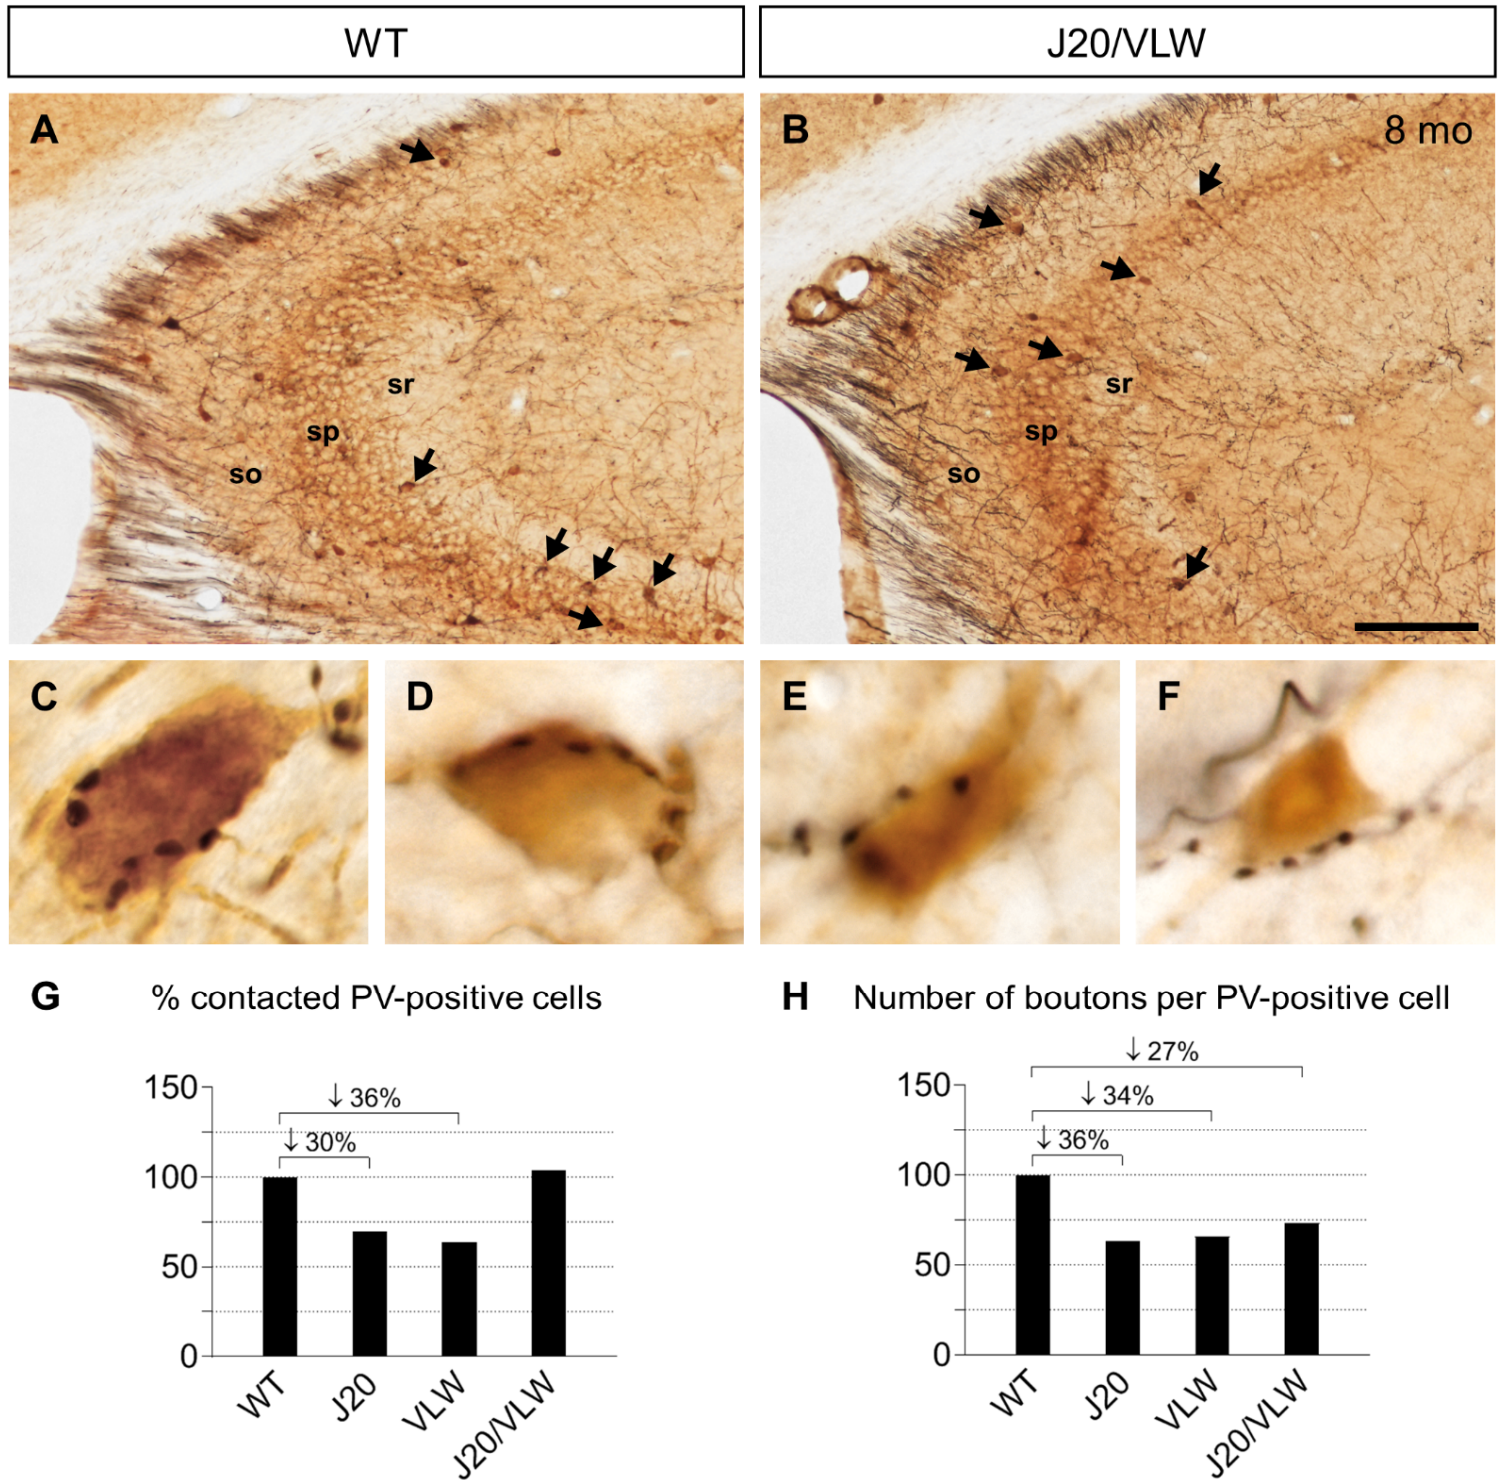

Figure 7

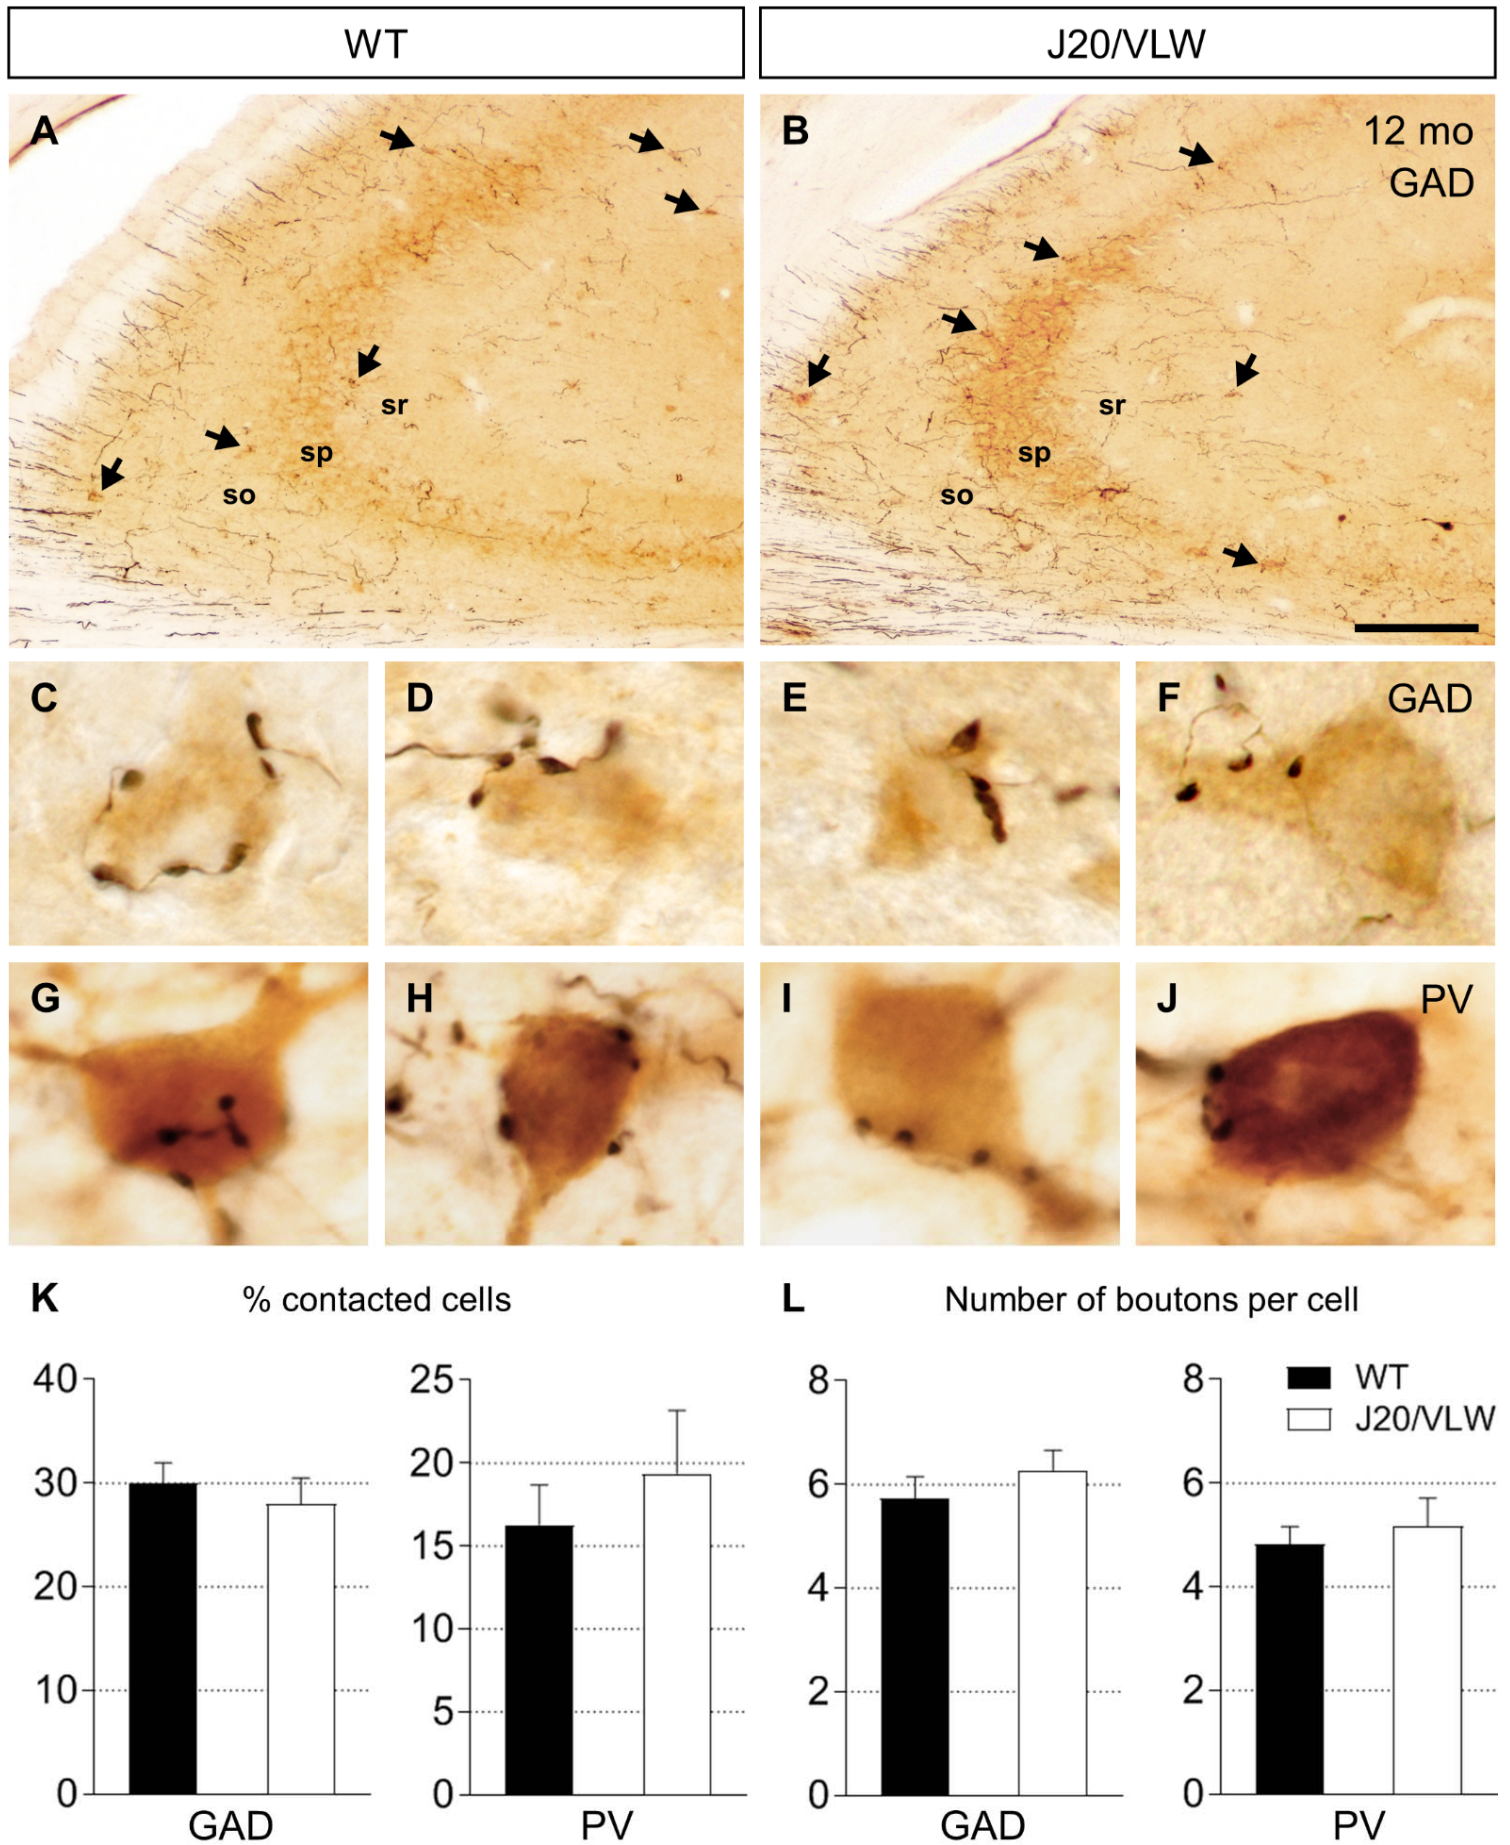

Figure 8

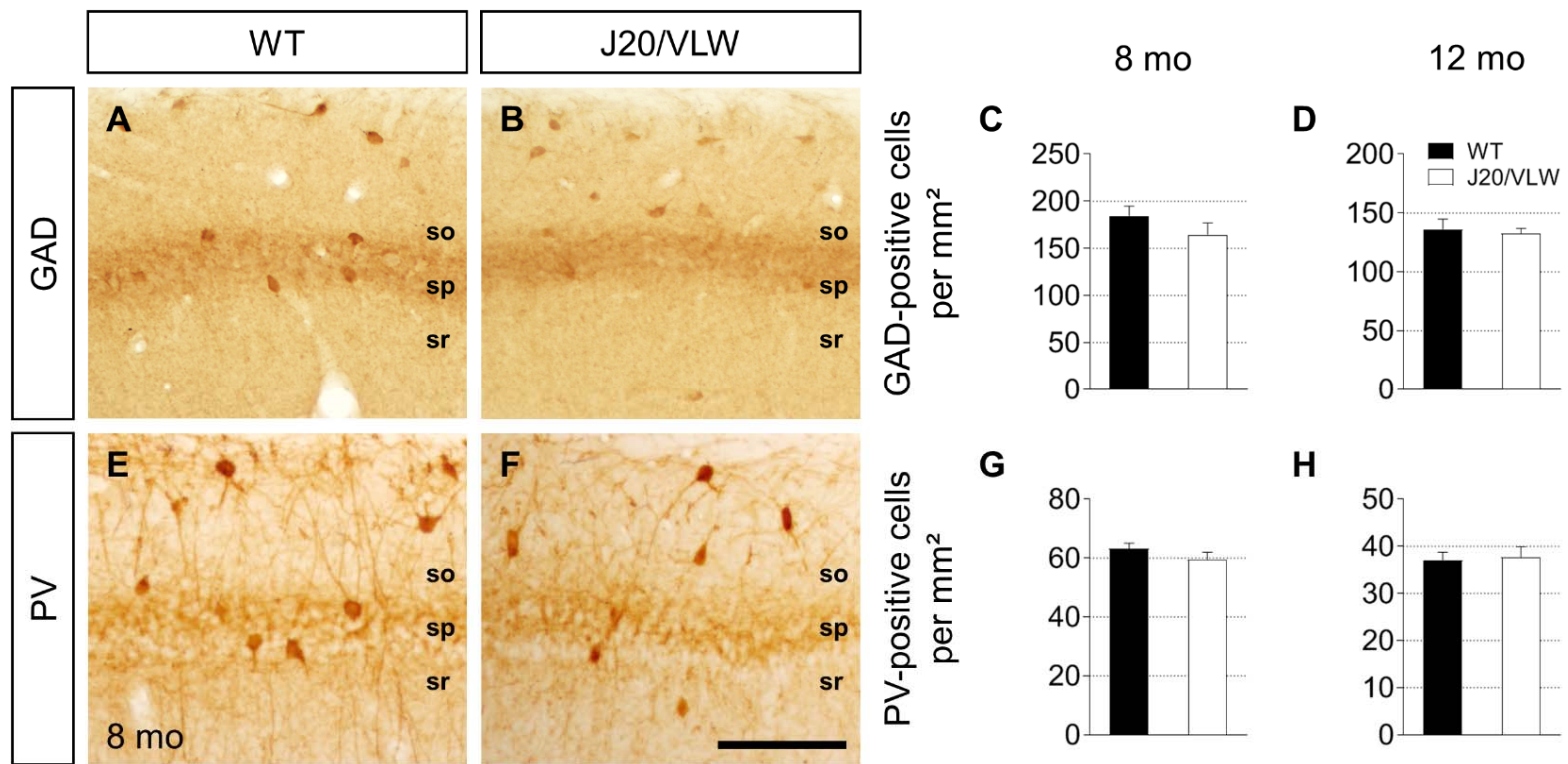

Figure 9

**A** Small box

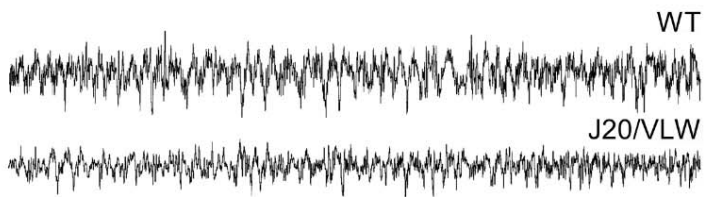

**B** Large box

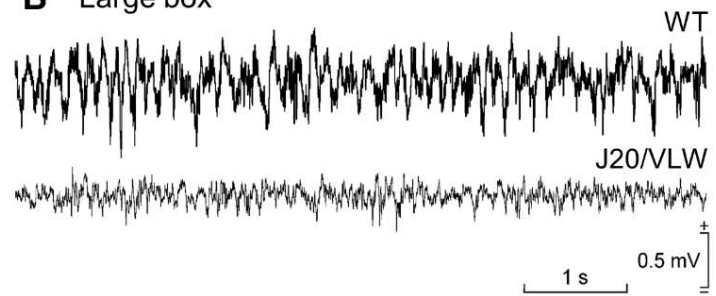

**C** Theta rhythm

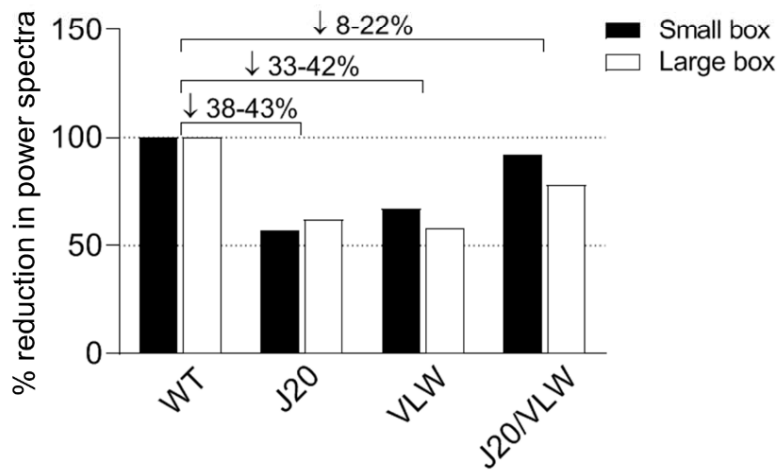

**D** Gamma rhythm

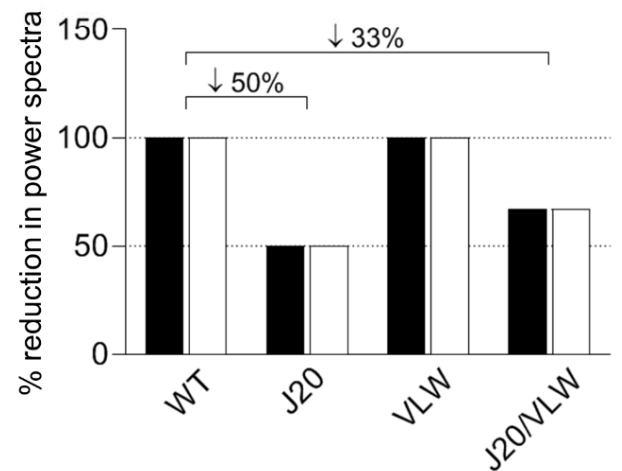

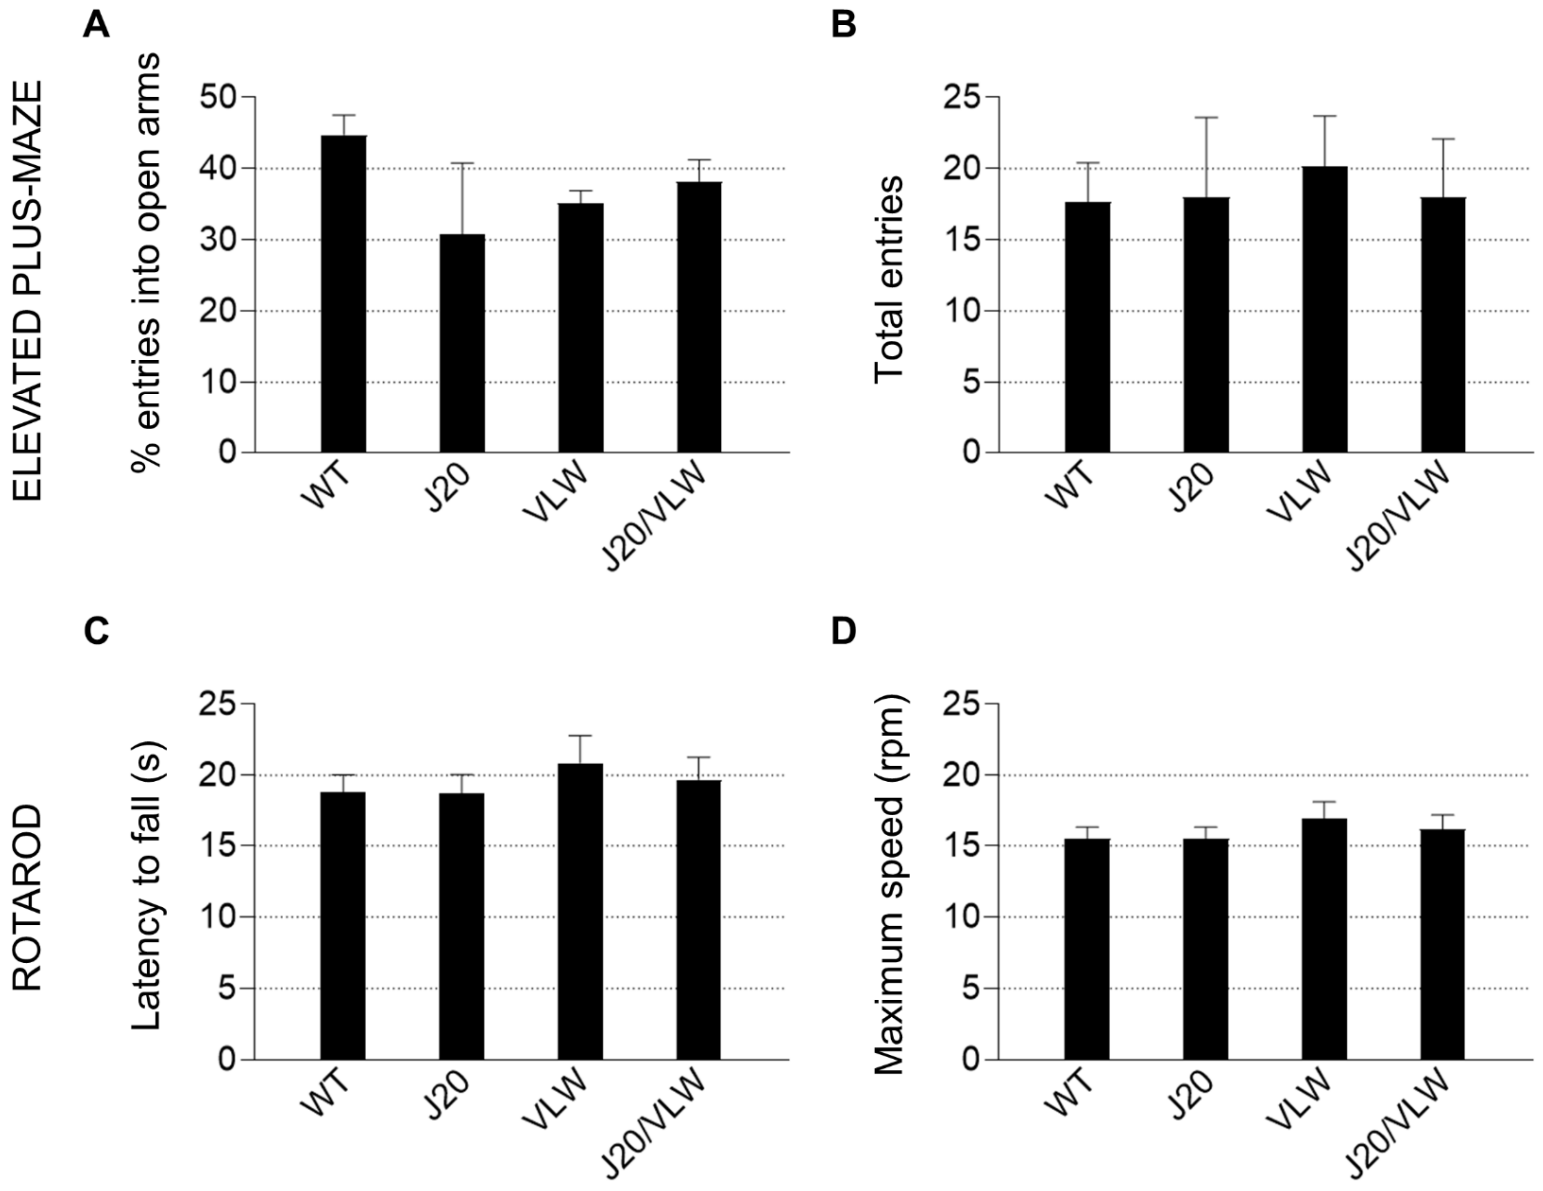

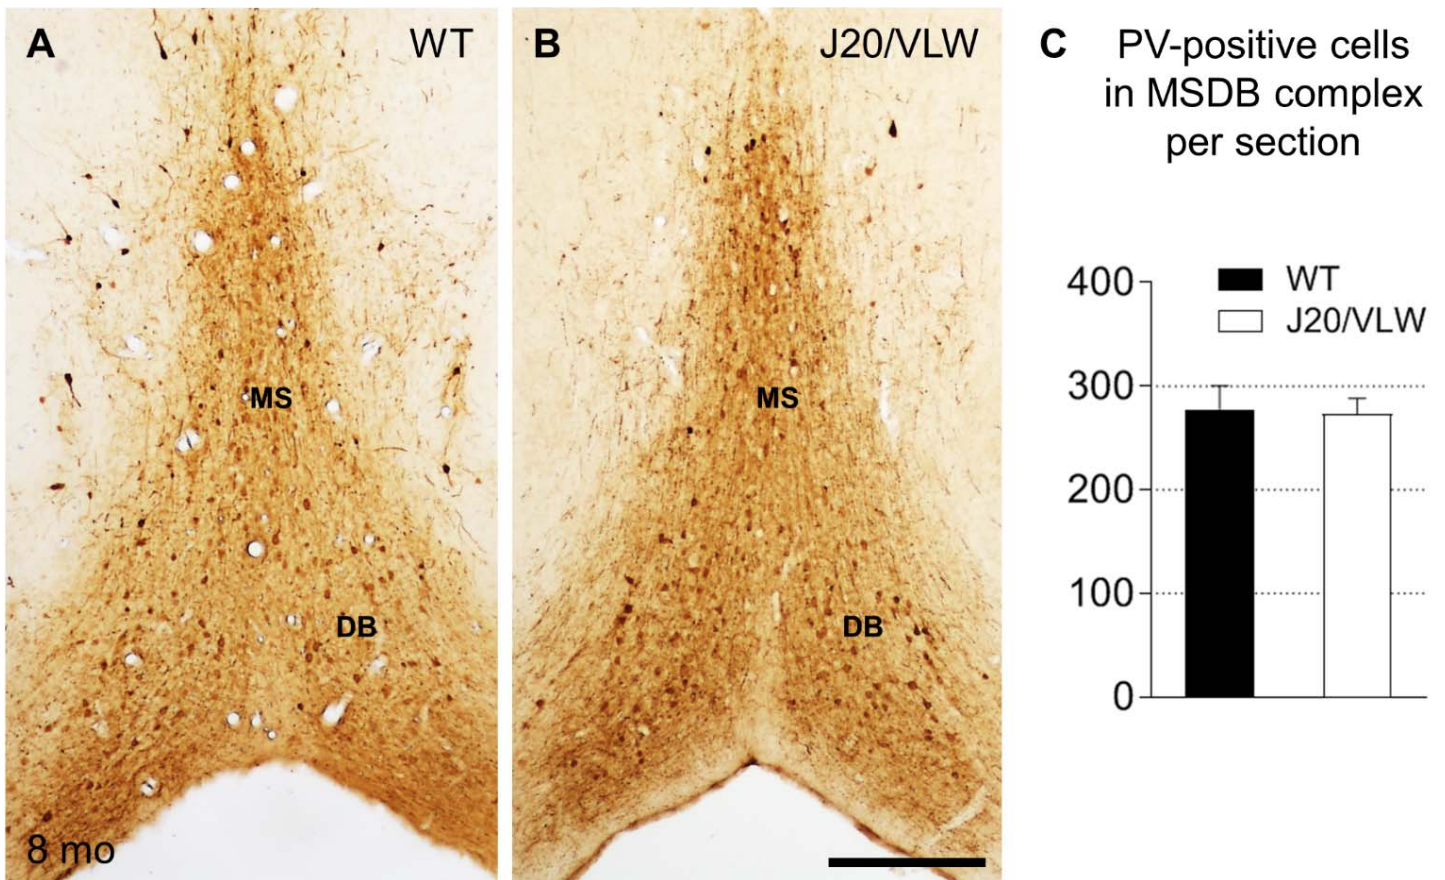

Source: https://www.biorxiv.org/content/biorxiv/early/2020/12/11/2020.12.10.417907.full.pdf
